1 **Rotavirus Calcium Dysregulation Manifests as Dynamic Calcium Signaling in the**  
2 **Cytoplasm and Endoplasmic Reticulum**

3  
4 Alexandra L. Chang-Graham<sup>1</sup>, Jacob L. Perry<sup>1</sup>, Alicia C. Strtak<sup>1</sup>, Nina K.  
5 Ramachandran<sup>1</sup>, Jeanette M. Criglar<sup>1</sup>, Asha A. Philip<sup>3</sup>, John T. Patton<sup>3</sup>, Mary K.  
6 Estes<sup>1,2</sup>, and Joseph M. Hyser<sup>1\*</sup>

7  
8 <sup>1</sup>Alkek Center for Metagenomic and Microbiome Research; Department of Molecular  
9 Virology and Microbiology; <sup>2</sup>Department of Medicine, Gastroenterology and Hepatology,  
10 Baylor College of Medicine, Houston, TX 77303. <sup>3</sup>Department of Biology, Indiana  
11 University, Bloomington, IN 47405

12  
13 \*Correspondence should be sent to:  
14 Joseph M. Hyser  
15 Alkek Center for Metagenomic and Microbiome Research  
16 Department of Molecular Virology and Microbiology  
17 MS: BCM385  
18 Baylor College of Medicine  
19 Houston, TX, 77303  
20 PH: 713-798-4514  
21 FAX: 713-798-3586  
22 [Joseph.Hyser@bcm.edu](mailto:Joseph.Hyser@bcm.edu)

23  
24 No conflicts of interest exist.

25  
26  
27

28 **Abstract**

29 Like many viruses, rotavirus (RV) dysregulates calcium homeostasis by elevating  
30 cytosolic calcium ( $[Ca^{2+}]_{cyt}$ ) and decreasing endoplasmic reticulum (ER) stores. While  
31 an overall, monophasic increase in  $[Ca^{2+}]_{cyt}$  during RV infection has been shown, the  
32 nature of the RV-induced aberrant calcium signals and how they manifest over time at  
33 the single-cell level have not been characterized. Thus, we generated cell lines and  
34 human intestinal enteroids (HIEs) stably expressing cytosolic and/or ER-targeted  
35 genetically-encoded calcium indicators to characterize calcium signaling throughout RV  
36 infection by time-lapse imaging. We found that RV induces highly dynamic  $[Ca^{2+}]_{cyt}$   
37 signaling that manifest as hundreds of discrete  $[Ca^{2+}]_{cyt}$  spikes, which increase during  
38 peak infection. Knockdown of nonstructural protein 4 (NSP4) attenuates the  $[Ca^{2+}]_{cyt}$   
39 spikes, consistent with its role in dysregulating calcium homeostasis. RV-induced  
40  $[Ca^{2+}]_{cyt}$  spikes were primarily from ER calcium release and were attenuated by  
41 inhibiting the store-operated calcium entry (SOCE) channel Orai1. RV-infected HIEs  
42 also exhibited prominent  $[Ca^{2+}]_{cyt}$  spikes that were attenuated by inhibiting SOCE,  
43 underlining the relevance of these  $[Ca^{2+}]_{cyt}$  spikes to gastrointestinal physiology and  
44 role of SOCE in RV pathophysiology. Thus, our discovery that RV increases  $[Ca^{2+}]_{cyt}$   
45 by dynamic  $Ca^{2+}$  signaling, establishes a new, paradigm-shifting understanding of the  
46 spatial and temporal complexity of virus-induced  $Ca^{2+}$  signaling.

47

## 48 **Introduction**

49 Eukaryotic signal transduction pathways employ a variety of signaling molecules  
50 to regulate cellular processes. Calcium ( $\text{Ca}^{2+}$ ) is one of the most ubiquitous secondary  
51 messengers in the cell, which tightly regulates  $\text{Ca}^{2+}$  movement through the coordinated  
52 function of  $\text{Ca}^{2+}$  channels, transporters, and pumps. Since  $\text{Ca}^{2+}$  signaling modulates a  
53 wide array of cellular processes, it is not surprising that many different viruses exploit  
54  $\text{Ca}^{2+}$  signaling to facilitate their replication, and the resulting dysregulation of  $\text{Ca}^{2+}$   
55 signaling causes pathogenesis. Rotavirus (RV), a member of the *Reoviridae* family, is  
56 one of the first viruses shown to elevate cellular  $\text{Ca}^{2+}$  levels and has become a widely-  
57 used model system to characterize mechanisms by which viruses dysregulate host  $\text{Ca}^{2+}$   
58 homeostasis<sup>1</sup>. RV is a clinically important enteric virus that causes severe diarrhea and  
59 vomiting in children, resulting in over approximately 258 million diarrhea episodes and  
60 198,000 deaths in 2016<sup>2</sup>. Hyperactivation of cyclic nucleotide (e.g., cAMP/cGMP) and  
61  $\text{Ca}^{2+}$  signaling pathways is a common strategy among enteric pathogens<sup>3</sup>. Thus,  
62 understanding how RV exploits  $\text{Ca}^{2+}$  signaling is key to understanding and combating  
63 RV-induced diarrhea.

64 RV was first reported to elevate cytosolic [ $\text{Ca}^{2+}$ ] by Michelangeli *et al.* (1991),  
65 which stimulated subsequent research into how RV alters cellular  $\text{Ca}^{2+}$  levels<sup>4</sup>. RV  
66 causes a 2-fold steady-state increase in cytosolic  $\text{Ca}^{2+}$ , which is due to increased  $\text{Ca}^{2+}$   
67 release from the endoplasmic reticulum (ER) and increased  $\text{Ca}^{2+}$  influx through host  
68  $\text{Ca}^{2+}$  channels in the plasma membrane (PM)<sup>1,5</sup>. Elevated cytosolic  $\text{Ca}^{2+}$  activates  
69 autophagy, which is critical for RV replication, and has wide-ranging consequences to

70 host cell functions, including disruption of the cytoskeleton and activation of chloride and  
71 serotonin secretion to cause diarrhea and vomiting<sup>1,5</sup>.

72 RV dysregulates Ca<sup>2+</sup> homeostasis by at least two functions of its nonstructural  
73 protein 4 (NSP4), a glycoprotein with multiple functions during the infection<sup>5</sup>. In RV-  
74 infected cells, ER-localized NSP4 is a viroporin (*i.e.*, virus-encoded ion channel) that  
75 releases ER Ca<sup>2+</sup> and reduces ER Ca<sup>2+</sup> stores causing a persistent increase in cytosolic  
76 Ca<sup>2+</sup> <sup>6-8</sup>. Using patch clamp electrophysiology, we demonstrated that the NSP4 viroporin  
77 domain (aa47-90) forms a Ca<sup>2+</sup>-permeable ion channel, confirming that NSP4 can  
78 directly mediate loss of ER Ca<sup>2+</sup> <sup>9</sup>. Decreased ER Ca<sup>2+</sup> activates stromal interaction  
79 molecule 1 (STIM1), an ER Ca<sup>2+</sup> sensor, which in turn activates Ca<sup>2+</sup> influx through  
80 store-operated calcium entry (SOCE) channels in the PM, primarily Orai<sup>10</sup>. Voltage-  
81 gated Ca<sup>2+</sup> channels and the sodium-calcium exchanger (NCX) have also been  
82 implicated in Ca<sup>2+</sup> influx in RV-infected cells<sup>11,12</sup>. Finally, through a mechanistically  
83 distinct pathway, RV-infected cells secrete an extracellular NSP4 (eNSP4) cleavage  
84 product that elicits a receptor-mediated, inositol triphosphate (IP<sub>3</sub>)-dependent Ca<sup>2+</sup>  
85 signal <sup>13,14</sup>. eNSP4 induces diarrhea in neonatal mice, making this the first identified  
86 viral enterotoxin <sup>13,15</sup>. At the cellular level, the eNSP4-induced Ca<sup>2+</sup> signal activates  
87 chloride secretion through Ca<sup>2+</sup>-activated chloride channels (*e.g.*, anoctamin 1),  
88 consistent with its enterotoxin activity *in vivo* <sup>16,17</sup>. Thus, NSP4 dysregulates Ca<sup>2+</sup> by  
89 both directly releasing ER Ca<sup>2+</sup> and by exploiting host SOCE and agonist-induced Ca<sup>2+</sup>  
90 signaling pathways<sup>1</sup>.

91 While the global dysregulation of Ca<sup>2+</sup> homeostasis by RV has been well  
92 characterized, many mechanistic details about RV-induced Ca<sup>2+</sup> signaling remain

93 unknown. First, cell population-based studies show that RV induces a monophasic 2-  
94 fold increase in cytosolic  $\text{Ca}^{2+}$  during infection<sup>18,19</sup>, but whether individual cells manifest  
95 this as a monophasic  $\text{Ca}^{2+}$  increase or a series of discrete  $\text{Ca}^{2+}$  signals remains  
96 unknown. This is an important distinction because the amplitude, duration, and degree  
97 of oscillation of cytosolic  $\text{Ca}^{2+}$  signals regulate downstream pathways. For example, a  
98 sustained increase in cytosolic  $\text{Ca}^{2+}$  activates apoptotic programs, whereas transient or  
99 oscillating  $\text{Ca}^{2+}$  signals activate proliferation and pro-survival pathways<sup>20,21</sup>. Second,  
100 studies in single RV-infected cells have focused on times late post-infection, 7-8 hours  
101 post-infection (hpi)<sup>7,11</sup>. Thus, it is not known whether RV dysregulates  $\text{Ca}^{2+}$  signaling  
102 early in infection or how dysregulation of  $\text{Ca}^{2+}$  homeostasis progresses during the  
103 infection. Finally, RV-induced depletion of ER  $\text{Ca}^{2+}$  remains controversial due to  
104 conflicting data. RV decreases agonist-induced release of ER  $\text{Ca}^{2+}$  and induces STIM1  
105 activation, suggesting decreased ER  $\text{Ca}^{2+}$  levels<sup>10,22</sup>. However, greater uptake of  
106 radioactive  $\text{Ca}^{2+}$  into ER stores has also been observed<sup>7</sup>. As with cytosolic  $\text{Ca}^{2+}$ , ER  
107  $\text{Ca}^{2+}$  levels are dynamic; yet RV-induced changes to ER  $\text{Ca}^{2+}$  and how this relates to  
108 cytosolic  $\text{Ca}^{2+}$  signaling remain incompletely characterized.

109         Addressing these gaps-in-knowledge requires the ability to measure changes in  
110 cytosolic and ER  $\text{Ca}^{2+}$  with single-cell resolution over many hours. For many years,  
111 technical limitations of  $\text{Ca}^{2+}$  indicator dyes (e.g., photobleaching, uneven loading, and  
112 dye leakage) made single-cell measurements of  $\text{Ca}^{2+}$  signaling throughout the entire RV  
113 infection not feasible. However, we recently developed the use of genetically-encoded  
114 calcium indicators (GECIs) for the study of  $\text{Ca}^{2+}$  signaling in virus-infected cells<sup>23</sup>.  
115 GECIs are dynamic fluorescent protein-based  $\text{Ca}^{2+}$  sensors, and variants have been

116 developed for simultaneous  $\text{Ca}^{2+}$  measurements in multiple cellular compartments (e.g.,  
117 cytoplasm and ER) <sup>24</sup>. The stability and targetability of GECIs provides the spatial and  
118 temporal resolution needed to perform long-term live-cell  $\text{Ca}^{2+}$  imaging such that  $\text{Ca}^{2+}$   
119 signaling can be measured throughout a RV infection. The goal of this study was to use  
120 cell lines and human intestinal enteroids (HIEs) stably expressing cytoplasmic and/or  
121 ER-localized GECIs to define RV-induced  $\text{Ca}^{2+}$  signaling dynamics at the single-cell  
122 level, and thereby gain new mechanistic insights into how RV dysregulates  $\text{Ca}^{2+}$   
123 homeostasis.

124 **Materials and Methods**

125 **Cells and rotaviruses.** MA104 cells (African green monkey kidney cells) and HEK293T  
126 cells (ATCC CRL-3216) were cultured in high glucose DMEM supplemented with 10%  
127 fetal bovine serum (FBS) and Antibiotic/Antimycotic (Invitrogen) at 37°C in 5% CO<sub>2</sub>.  
128 Rotavirus SA114F was produced from in-house stocks. Porcine strains OSUv and  
129 OSUa were provided as a kind gift from Dr. Lennart Svennson <sup>25</sup>, and the human strain  
130 Ito was prepared as previously described <sup>26</sup>. Recombinant SA11 clone 3 expressing an  
131 mRuby3 red fluorescent protein reporter downstream of NSP3 (SA11-mRuby) was  
132 generated using a modified plasmid based reverse genetics (RG) system <sup>27</sup>. Briefly, the  
133 NSP4 open reading frame (ORF) in the pt7/NSP3 plasmid was replaced with an ORF  
134 encoding NSP3 fused downstream to FLAG-tagged mRuby3. To promote the  
135 translation of NSP3 and mRuby3 as separate proteins, we inserted a teschovirus 2A-  
136 like stop-restart translation element between the NSP3 and FLAG-tagged mRuby3  
137 coding sequences<sup>28</sup>. The SA11-mRuby virus was generated by co-transfection of BHK-  
138 T7 cells with pT7 plasmids expressing RV plus-sense RNAs along with a plasmid  
139 expressing the African swine fever virus NP868R capping enzyme from a CMV  
140 promoter. All viruses were propagated in MA104 cells in serum-free DMEM  
141 supplemented with 1 µg/mL Worthington's Trypsin, and after harvest stocks were  
142 subjected to three freeze/thaw cycles and activated with 10 µg/mL Worthington's  
143 Trypsin for 30 min at 37 °C prior to use.

144

145 **Chemicals.** 2-APB, KB-R7943 mesylate, BTP2 (YM 58483), and BAPTA-AM were  
146 purchased from Tocris Bioscience. Methoxyverapamil (D600), nitrotetrazolium blue

147 (NBT), and BCIP were purchased from Sigma-Aldrich. Synta66 and GSK7975A were  
148 purchased from Aobious. EGTA solution (0.5 M, pH 8.0) was purchased from  
149 Invitrogen.

150

151 **Antibodies.** To detect RV, we used rabbit anti-RV strain Alabama <sup>29</sup> (IF, 1:80,000;  
152 western blot, 1:3000), guinea pig anti-NSP2 <sup>30</sup> (IF, 1:5000), and rabbit anti-NSP4  
153 aa120-147 <sup>31</sup> (western blot, 1:3000). Secondary antibodies for IF were donkey anti-  
154 rabbit AlexaFluor 568 (Invitrogen) and donkey anti-guinea pig Dylight 549 (Rockland),  
155 both at 1:2000. For western blots, we used mouse anti-GAPDH monoclonal antibody  
156 (Lifetein) (1:5000) and secondary antibodies alkaline phosphatase-conjugated goat anti-  
157 rabbit IgG or goat anti-mouse IgG (Southern Biotech) (1:2000).

158

159 **Calcium indicator lentiviruses, cell lines, and enteroids.** GCaMP5G (Addgene  
160 plasmid #31788), GCaMP6s (Addgene plasmid #40753), and G-CEPIA1er (Addgene  
161 plasmid #105012) were cloned into pLVX-Puro. RGECO1.2 (Addgene plasmid #45494),  
162 R-CEPIA1er (Addgene plasmid #58216), and GCaMP6s were cloned into pLVX-IRES-  
163 Hygro. Lentivirus vectors for the GECl constructs were packaged in HEK293T cells as  
164 previously described <sup>23</sup> or produced commercially (Cyagen Biosciences, Inc.).  
165 Production of the MA104-GCaMP5G and MA104-GCaMP5G/RCEPIAer cell lines were  
166 previously described and similar methods were used to generate MA104-  
167 RGECO1/GCEPIAer and the MA104-GCaMP6s-shRNA lines <sup>23</sup>. Human intestinal  
168 enteroids expressing GCaMP6s (G6S-HIEs) were created using lentivirus transduction



169 as described previously and grown in high Wnt3a CMGF+ with 1  $\mu\text{g}/\text{mL}$  puromycin for  
170 selection<sup>32</sup>. Proper GECl functionality was validated by responses to 50  $\mu\text{M}$  ATP.

171

172 **MA104-GCaMP6s cells expressing NSP4 shRNAs.** Lentivirus constructs encoding  
173 shRNA targeting SA11 gene 10 and a non-targeting scrambled shRNA negative control  
174 were generated and packaged by America Pharma Source, LLC. The NSP4-shRNA1  
175 targets gene 10 nt50-70 (5'-GCTTACCGACCTCAATTATAC-3') and NSP4-shRNA2  
176 targets gene 10 nt176-196 (5'-GCTACATAAAGCATCCATTCC-3'). The shRNA-  
177 expression vectors encode a blasticidin-resistance gene for drug selection. Parental  
178 MA104 cells were transduced with the shRNA-expressing constructs and at 72 hrs post-  
179 transduction the cells were passaged in the presence of 30  $\mu\text{g}/\text{mL}$  blasticidin to select  
180 for stably transduced cells. These three cell lines were then transduced with GCaMP6s  
181 GECl (in pLVX-IRES-Hygro) and passaged with 50  $\mu\text{g}/\text{mL}$  hygromycin B and 30  $\mu\text{g}/\text{mL}$   
182 blasticidin to select for co-expression of GCaMP6s and the shRNA.

183

184 **Establishment of HIE cultures.** Three-dimensional human intestinal enteroid (HIE)  
185 cultures were generated from crypts isolated from adult patients undergoing bariatric  
186 surgery as previously described<sup>26,33</sup>. These established cultures were obtained at Baylor  
187 College of Medicine through the Texas Medical Center Digestive Diseases Center  
188 Gastrointestinal Experimental Model Systems Core. For these studies, jejunum HIEs  
189 from patient J3 were used. Complete media with and without growth factors (CMGF+  
190 and CMGF-, respectively), differentiation media, and high Wnt3a CMGF+ (hW-CMGF+)  
191 were prepared as previously described<sup>26,33,34</sup>. Fluorobrite DMEM supplemented with

192 15mM HEPES, 1X sodium pyruvate, 1X Glutamax, and 1X non-essential amino acids  
193 (Invitrogen) was used for fluorescence  $\text{Ca}^{2+}$  imaging (FB-Plus). An FB-Plus-based  
194 differentiation medium (FB-Diff) consisted of FB-Plus with the same added components  
195 as differentiation media, but without Noggin. HIEs were grown in phenol red-free,  
196 growth factor-reduced Matrigel (Corning). G6S-jHIE monolayers were prepared from  
197 three-dimensional cultures and seeded into optical-bottom 10-well Cellview chamber  
198 slides coated with dilute collagen IV (Sigma) as described previously<sup>35,36</sup>. After 24 hr in  
199 CMGF+ and 10  $\mu\text{M}$  Y-27632 Rock inhibitor, differentiation medium was used and  
200 changed every day for 4-5 days.

201

202 **Microscopy and image analysis.** To image viroplasms, we used a GE Healthcare  
203 DeltaVision LIVE High Resolution Deconvolution with an Olympus IX-71 base and  
204 illumination provided by a xenon lamp. Images were captured with Plan Apo 60X Oil  
205 DIC objective and a pco.edge sCMOS camera. Images were acquired and deconvolved  
206 using SoftWoRx software and further analyzed with Fiji (ImageJ).

207 For calcium imaging, MA104 cells and HIEs were imaged with a widefield  
208 epifluorescence Nikon TiE inverted microscope using a SPECTRAX LED light source  
209 (Lumencor) and either a 20x Plan Fluor (NA 0.45) phase contrast or a 20X Plan Apo  
210 (NA 0.75) differential interference contrast (DIC) objective. Fluorescence and  
211 transmitted light images were recorded using an ORCA-Flash 4.0 sCMOS camera  
212 (Hamamatsu), and Nikon Elements Advanced Research v4.5 software was used for  
213 multipoint position selection, data acquisition, and image analysis.

214 Images were read-noise subtracted using an average of 10 no-light acquisitions  
215 of the camera. Single cells were selected as Regions of Interest (ROI) and fluorescence  
216 intensity measured for the experiment. 3D HIE's fluorescence was measured  
217 individually using threshold analysis adjusted to select each enteroid with the Fill Holes  
218 algorithm included. Enteroids that moved out of the field of view or could not be  
219 separated from adjacent enteroids were removed from analysis. The fluorescence  
220 intensity of whole field-of-view was measured for HIE monolayers.

221 Fluorescence intensity values were exported to Microsoft Excel and normalized  
222 to the baseline fluorescence. The number and magnitude of  $\text{Ca}^{2+}$  spikes were  
223 calculated by subtracting each normalized fluorescence measurement from the previous  
224 measurement to determine the change in GECI fluorescence ( $\Delta F$ ) between each  
225 timepoint.  $\text{Ca}^{2+}$  signals with a  $\Delta F$  magnitude of  $> 5\%$  were counted as  $\text{Ca}^{2+}$  spikes.

226

227 **Calcium imaging. MA104-GECI cells.** Confluent monolayers of MA104-GECI cells in 8-  
228 well chamber slides (ibidi) were mock- or RV-infected in FBS-free media for 1 hr at the  
229 indicated multiplicity of infection (MOI). Then the inoculum was removed and replaced  
230 with FB-Plus, and for appropriate studies, with DMSO or drugs at indicated  
231 concentrations. The slide was mounted into an Okolab stage-top incubation chamber  
232 equilibrated to  $37^{\circ}\text{C}$  with a humidified  $5\% \text{CO}_2$  atmosphere. For each experiment, 3-5  
233 positions per well were selected and imaged every 1 minute for  $\sim 18$ -20 hrs.

234 **GECI HIEs.** To test  $\text{Ca}^{2+}$  response, 3D G6S-jHIEs were suspended in 25% Matrigel  
235 diluted in FB-Diff media and seeded into optical-bottom 10-well Cellview chamber slides  
236 (Greiner bio-one) thinly coated with Matrigel. After baseline imaging using the stage-top

237 incubator, 200 $\mu$ M carbachol in FB-Diff or FB-Diff alone was added to the well and  
238 imaging continued for 1 hour with 6-10 enteroids imaged every 10 s.

239 For RV infection in 3D HIEs, the jHIEs were split and grown in hW-CMGF+ for 2  
240 days followed by differentiation medium for 1 day. G6S-jHIEs were gently washed using  
241 ice cold 1XPBS and resuspended in inoculum of 50 $\mu$ L MA104 cell lysate or RV (strain  
242 Ito) diluted with 150  $\mu$ L CMGF- and incubated for 1 hr. Then HIEs were washed,  
243 resuspended in 25% Matrigel diluted in FB-Diff (with DMSO or 2-APB in indicated  
244 experiments) and pipetted onto 8-well chamber slides (Matek) pre-coated with Matrigel.  
245 Imaging positions were chosen so that between 20-50 enteroids were selected per  
246 experimental condition. Enteroids were imaged using the stage-top incubator with  
247 transmitted light and GFP fluorescence every 2-3 minutes for ~18 hrs.

248 For RV infection in monolayers, G6S-jHIE monolayers were washed once with  
249 CMGF- and treated with an inoculum of 50 $\mu$ L CMGF- plus 30 $\mu$ L MA104 cell lysate or  
250 RV (strain Ito) and incubated for 2 hr. Then inoculum was removed, and monolayers  
251 were washed once with FB-Diff before adding FB-Diff with DMSO or 2-APB. Monolayers  
252 were transferred to the stage-top incubator for imaging with 4 fields of view chosen per  
253 well, and GFP fluorescence was measured every minute for ~18 hrs.

254

255 **Store-operated calcium entry assay.** G6S-jHIE monolayers after 4 days in  
256 differentiation media were washed and incubated in 0mM Ca<sup>2+</sup> (0Ca<sup>2+</sup>) Ringers solution  
257 (160mM NaCl, 4.5mM KCl, 1mM MgCl<sub>2</sub>, 10mM HEPES, pH=7.4). Endoplasmic  
258 reticulum Ca<sup>2+</sup> stores were depleted by incubating cells with 500nM thapsigargin in  
259 0Ca<sup>2+</sup> with either 50  $\mu$ M 2-APB or DMSO as a vehicle control. SOCE was measured

260 using live-cell fluorescence imaging of the increase in GFP fluorescence after the  
261 addition of normal Ringers to bring the total  $\text{Ca}^{2+}$  concentration to 2mM.

262

263 **Western blot analysis.** RV proteins were detected by immunoblot analysis as  
264 previously described, with the following modifications<sup>31</sup>. Cells were lysed using a 1X  
265 RIPA buffer solution [10mM Tris-HCL pH 8.0, 1mM EDTA, 1% Triton X-100, 0.1%  
266 sodium deoxycholate, 0.1% SDS, 140mM NaCl, and 1 tablet complete mini protease  
267 inhibitor (Roche)] and passed through a Qias shredder (Qiagen). Samples were boiled for  
268 10 min at 100°C in SDS-PAGE sample buffer and separated on Tris-glycine 4-20%  
269 SDS-PAGE gels (BioRad). Detected protein bands for each blot were quantified using  
270 ImageJ software for gel densitometry measurements of NSP4:GAPDH.

271

272 **Immunofluorescence.** MA104 cells and HIEs were fixed using the Cytofix/Cytoperm kit  
273 (BD Biosciences) according to manufacturer instructions. Primary antibodies were  
274 diluted in 1X Perm/Wash overnight at 4°C. The next day, the cells were washed three  
275 times with 1X Perm/Wash solution and then incubated with corresponding secondary  
276 antibodies for 1 hr at room temperature. Nuclei were stained with NucBlue Fixed Cell  
277 Stain (Life Technologies) for 5 min at room temperature and washed with 1X PBS for  
278 imaging.

279

280 **Plaque assays.** Plaque assays were performed as described previously with the  
281 following modifications<sup>37</sup>. Briefly, MA104 cells or the MA104-shRNA expressing cells  
282 were seeded and grown to confluency in 6 wells plates. Wells were infected at 10-fold

283 dilutions in duplicate for 1 hr and media replaced with an overlay of 1.2% Avicel in  
284 serum-free DMEM supplemented with DEAE dextran, and 1µg/mL Worthington's  
285 Trypsin, and, for indicated experiments, DMSO vehicle or SOCE drugs<sup>38</sup>. The cells were  
286 incubated at 37°C/5% CO<sub>2</sub> for 48-72 hrs before overlay was removed and cells stained  
287 with crystal violet to count plaques.

288

289 **RNA extraction, reverse transcription, and quantitative PCR.** Total RNA was  
290 extracted from HIEs wells (in hW-CMGF+ or differentiation media for 4 days) or MA104  
291 cells grown to confluency in a 6-well plate using TRIzol reagent (Ambion). Total RNA  
292 was treated with Turbo DNase I (Ambion) and cDNA was generated from 250 ng RNA  
293 using the SensiFAST cDNA synthesis kit (Bioline). Quantitative PCR was performed  
294 using Fast SYBR Green (Life Technologies) with primers designed using NCBI Primer-  
295 Blast (Table 1) and using a QuantStudio real time thermocycler (Applied Biosciences).  
296 Target genes were normalized to the housekeeping gene ribosomal subunit 18s and  
297 relative expression was calculated using the ddCT method.

298

299 **Statistical analysis.** Biostatistical analyses were performed using GraphPad  
300 Prism (version 8.1) with results presented as mean ± standard deviation. Comparisons  
301 used an unpaired Student's t-test, the nonparametric Mann-Whitney test, or a One-way  
302 Analysis of Variance (ANOVA) with Tukey's post hoc multiple comparisons test where  
303 appropriate. Differences were considered statistically significant for  $p < 0.05$ . All authors  
304 had access to the study data, reviewed, and approved the final manuscript.

305

## 306 **Results**

307 Previous studies have shown that RV significantly increases cytosolic  $\text{Ca}^{2+}$  over  
308 several hours during the peak of RV replication<sup>18,39</sup>; however, the kinetics of this  
309 increase and whether it is a monophasic increase or manifests as discrete  $\text{Ca}^{2+}$   
310 transients are not known. To address these questions, we developed a series of cell  
311 lines stably expressing GECs and used these cell lines to perform live-cell  $\text{Ca}^{2+}$   
312 imaging over the course of a RV infection<sup>23</sup>. For the long-term imaging experiments,  
313 MA104 cells stably expressing cytosolic GCaMP5G (MA104-GCaMP5G) were seeded  
314 into chamber slides and either mock- or RV-infected with strain SA114F (MOI 10), and  
315 GCaMP5G fluorescence imaged for ~18 hr (2-20 hpi) (Fig. 1). Mock-infected cells  
316 maintained a low fluorescence throughout the time course (Fig. 1A, upper panels),  
317 whereas RV-infected cells exhibited strongly increased fluorescence, indicating  
318 elevated  $\text{Ca}^{2+}$  levels (Fig. 1A, lower panels and Supplementary Video 1 online). Since  
319 GECs use an engineered calmodulin to sense  $\text{Ca}^{2+}$ , overexpression of GCaMP5G  
320 could act as a  $\text{Ca}^{2+}$  buffer and alter the kinetics of RV replication. To assess whether  
321 the MA104-GCaMP5G cells exhibited altered RV infection/protein synthesis, we  
322 analyzed NSP4 expression in parental MA104 cells and the MA104-GCaMP5G cells  
323 infected with SA114F (MOI 10) from 3-8 hpi by western blot (Fig. 1B). NSP4 expression  
324 was similar in both parental and GCaMP5G-expressing cells, indicating that stable  
325 GCaMP5G expression does not interfere with RV infection.

326 Next, we measured changes in cytosolic  $\text{Ca}^{2+}$  by determining the relative  
327 GCaMP5G fluorescence ( $F/F_0$ ) for the whole field-of-view (FOV) (~455  $\mu\text{m}^2$ ) for three  
328 replicate infections and time lapse images were acquired once per minute (Fig. 1C).

329 Mock-infected cells maintained low  $\text{Ca}^{2+}$  levels with few transient and low amplitude  
330  $\text{Ca}^{2+}$  signals (Fig. 1C, black and grey lines). In RV-infected cells, the steady-state  $\text{Ca}^{2+}$   
331 levels began to increase at ~6 hpi, and we observed many large amplitude, transient  
332  $\text{Ca}^{2+}$  signals that occurred concomitantly with the steady-state elevation in cytosolic  
333  $\text{Ca}^{2+}$  levels (Fig. 1C, arrow). Further, at 6-8 hpi the RV-infected cells had more low and  
334 moderate amplitude  $\text{Ca}^{2+}$  signals than mock-infected cells (Fig. 1D, arrows), which  
335 occurred during the initial increase in steady-state  $\text{Ca}^{2+}$  levels. A more detailed  
336 examination of the  $\text{Ca}^{2+}$  signaling over a period of 5 mins at 480 minutes post-infection  
337 (~8 hpi) shows that the increase in cytosolic  $\text{Ca}^{2+}$  manifests as discrete and dynamic  
338  $\text{Ca}^{2+}$  fluxes from individual or small groups of cells (Fig. 1E). The dynamic changes are  
339 exemplified by the two areas outlined (Fig. 1E, magenta or yellow box), showing  
340 substantial changes over the 5 min period. To compare our GECI-based  $\text{Ca}^{2+}$  imaging  
341 of RV-induced  $\text{Ca}^{2+}$  signaling to previous cell population-based studies, we determined  
342 the average GCaMP5G fluorescence from 18-19 hpi (Fig. 1F) and the slope of the  
343 fluorescence increase from 8-18 hpi (Fig. 1G). We found a similar ~2-fold increase in  
344  $[\text{Ca}^{2+}]_c$  and a rate of  $\text{Ca}^{2+}$  increase consistent with that found in studies using  $\text{Ca}^{2+}$   
345 indicator dyes<sup>12,18,19</sup>. Thus, the MA104-GCaMP5G cells exhibit the well-characterized  
346 hallmarks of RV-induced  $\text{Ca}^{2+}$  dysregulation but have greater spatial and temporal  
347 resolution to study  $\text{Ca}^{2+}$  in RV-infected cells. This has revealed a new dimension of the  
348 RV-induced  $\text{Ca}^{2+}$  signaling, in that the cytosolic  $\text{Ca}^{2+}$  increase manifests through highly  
349 dynamic and discrete  $\text{Ca}^{2+}$  signaling events, which had not been previously observed.

350

351 **RV-induces dynamic  $\text{Ca}^{2+}$  signaling**



352 Our long-term  $\text{Ca}^{2+}$  imaging approach using MA104-GCaMP5G cells had  
353 sufficient resolution to enable analysis of  $\text{Ca}^{2+}$  signaling at the single-cell level over the  
354 course of the RV infection. Three representative traces from mock- or RV-infected cells  
355 (MOI 10, imaged once per minute) show that while individual cells display unique  
356 characteristics of  $\text{Ca}^{2+}$  signaling, they all exhibit similar patterns of  $\text{Ca}^{2+}$  signaling (Fig.  
357 2A). Mock-infected cells maintain low cytosolic  $\text{Ca}^{2+}$  with few low amplitude  $\text{Ca}^{2+}$  signals  
358 (Fig. 2A, black lines), but RV-infected cells display a large number of large amplitude  
359  $\text{Ca}^{2+}$  transients, as well as an overall increase in cytosolic  $\text{Ca}^{2+}$  (Fig. 2A, red lines).  
360 These  $\text{Ca}^{2+}$  transients were the most prominent  $\text{Ca}^{2+}$  signal during the infection and  
361 were infrequently detected in mock-infected cells. Finally, as RV is a lytic virus, we  
362 observed clear evidence of cell lysis late in infection, but this was associated with a loss  
363 of GCaMP5G signal and dynamics because the sensor diffused away from the ruptured  
364 cells (see Supplementary Video 1 online). We sought to determine a threshold to define  
365 these “ $\text{Ca}^{2+}$  spikes” so that we could measure the number and amplitude of these  $\text{Ca}^{2+}$   
366 signals. To define a “ $\text{Ca}^{2+}$  spike”, we set a cutoff for the change in GCaMP5G  
367 fluorescence between two measurements to be greater than 5% ( $\Delta F > 5\%$ ). The mean  
368  $\text{Ca}^{2+}$  transient amplitude of mock-infected cells was 0.3% ( $\pm 0.5\%$  standard deviation)  
369 (data not shown; see Fig. 2D for a subset of this data). Thus the  $\Delta F > 5\%$  cutoff is more  
370 than 3 standard deviations above the mean, which establishes a stringent threshold for  
371 quantitating  $\text{Ca}^{2+}$  spikes. Next, we determined the change in fluorescence between  
372 each data point and found that the majority of  $\text{Ca}^{2+}$  spikes were captured in 1 image  
373 (Fig. 2B). This simple method enabled detection of  $\text{Ca}^{2+}$  spikes with approximately 80%  
374 accuracy; however, it results in a 20% under-estimation of  $\text{Ca}^{2+}$  spikes, which were

375 captured in 2-3 images (Fig. 2C, black dots). Nevertheless, using this method of  $\text{Ca}^{2+}$   
376 spike analysis, we found that RV significantly increases the number of  $\text{Ca}^{2+}$  spikes per  
377 cell (Fig. C). We then determined the amplitude for the top 150  $\text{Ca}^{2+}$  spikes per  
378 representative cell and found that while the amplitude was highly variable between RV-  
379 infected cells, these signals were significantly greater than mock-inoculated cells (Fig.  
380 2D). Finally, we compared the RV-induced  $\text{Ca}^{2+}$  spikes to the  $\text{Ca}^{2+}$  response induced by  
381 10  $\mu\text{M}$  ATP (Fig. 2E). As expected, ATP induced a strong  $\text{Ca}^{2+}$  flux that was similar to  
382 the amplitude of  $\text{Ca}^{2+}$  spikes induced during RV infection. Although the ATP-induced  
383 response was significantly greater than the RV-induced  $\text{Ca}^{2+}$  spikes, it is important to  
384 note that the amplitude of the ATP-induced signals represent the peak of the  $\text{Ca}^{2+}$   
385 response, whereas it is not possible to know how many of the RV-induced  $\text{Ca}^{2+}$  spikes  
386 were captured at the peak of the signal. Thus, at the individual cell level, a high MOI RV  
387 infection induces up to hundreds of discrete and high amplitude  $\text{Ca}^{2+}$  signaling events.

388         Next, we determined how these RV-induced  $\text{Ca}^{2+}$  signals differ with respect to  
389 different infectious doses. We infected MA104-GCaMP5G cells with SA114F or with a  
390 recombinant SA11 cl. 3 expressing mRuby from the NSP3 gene (SA11cl3-mRuby)<sup>28</sup>.  
391 Cells were infected at MOI of 10, 1, or 0.1, and we performed time-lapse  $\text{Ca}^{2+}$  imaging  
392 and single-cell analysis of the resulting  $\text{Ca}^{2+}$  signaling. Infection of cells with native  
393 SA114F at different MOIs showed the expected infectious dose-dependent increase in  
394 the number of RV-positive cells (Fig. 3A). Similarly, the SA11cl3-mRuby-infected cells  
395 exhibited an infectious dose-dependent increase in the number of RFP-positive cells at  
396 7 hpi (Fig. 3B), as well as an increase in RFP intensity from 7 hpi to 10 hpi (Fig. 3C).  
397 Representative single-cell  $\text{Ca}^{2+}$  traces for SA114F-infected cells show similar dynamic

398 increases in cytosolic Ca<sup>2+</sup> spikes as before, but cells infected with lower MOIs of 1 and  
399 0.1 exhibited a later onset of the Ca<sup>2+</sup> signaling and generally fewer and lower  
400 amplitude Ca<sup>2+</sup> spikes (Fig. 3D). The virus dose-dependent differences in the Ca<sup>2+</sup>  
401 signaling are clearly demonstrated by the time-lapse imaging at 6-7 hpi, which are  
402 superimposed onto the immunofluorescence images to detect RV-positive cells  
403 (Supplementary Video 2 online). In a more detailed examination of cytosolic Ca<sup>2+</sup> in RV-  
404 infected cells, we used a higher image acquisition frequency (1 image/1.5 sec) and  
405 again observed active and dynamic Ca<sup>2+</sup> signaling. While virtually every cell exhibited  
406 multiple Ca<sup>2+</sup> transients over the course of 10 mins, the Ca<sup>2+</sup> spike frequency and  
407 amplitude were variable from cell-to-cell (Supplemental Figure 1 & Supplementary  
408 Video 3 online). We quantitated the number of Ca<sup>2+</sup> spikes throughout the infection and  
409 found a dose-dependent decrease in the number of spikes per cell (Fig. 3F) for lower  
410 MOI infections. A similar phenotype was observed in cells infected with SA11cl3-  
411 mRuby, but in this case the mRuby expression enabled us to measure both Ca<sup>2+</sup>  
412 signaling and RV protein expression (Fig. 3E & Supplementary Video 4 online). We  
413 again observed that for lower MOI infections the onset of Ca<sup>2+</sup> signaling was later, and  
414 the Ca<sup>2+</sup> spike number and amplitude were generally lower. Further, onset of the Ca<sup>2+</sup>  
415 signaling corresponded to the detection of mRuby from the NSP3 gene. Quantitation of  
416 the number of Ca<sup>2+</sup> spikes per cell for SA11cl3-mRuby infections also showed a dose-  
417 dependent decrease with infectious dose (Fig. 3G). Thus, the number and amplitude of  
418 these Ca<sup>2+</sup> signaling events are related to both the infectious dose of RV and onset of  
419 RV protein synthesis.

420           Next, we sought to characterize the Ca<sup>2+</sup> signaling phenotype of different RV  
421 strains that infect humans or other animals. We compared the Ca<sup>2+</sup> signaling in MA104-  
422 GCaMP5G cells infected at MOI 1 with simian strain SA114F to that of human strain Ito.  
423 Immunofluorescence staining of Ito-infected cells (Fig. 4A) showed a similar number of  
424 infected cells as that for SA114F infected above (Fig. 3A). As above, we quantitated the  
425 number of Ca<sup>2+</sup> spikes per cell and found that both SA114F and Ito induced a significant  
426 increase in Ca<sup>2+</sup> spikes compared to mock-infected cells (Fig. 4B). These findings  
427 demonstrate that the dynamic Ca<sup>2+</sup> signaling phenotype is not exclusively a feature of  
428 animal RV strains. Further, we investigated the attenuated and virulent porcine OSU  
429 strains (OSUa and OSUv). Mutations in the OSUa NSP4 protein are associated with  
430 reduced elevation in cytosolic Ca<sup>2+</sup> levels in recombinant NSP4-expressing Sf9 cells <sup>40</sup>,  
431 but the Ca<sup>2+</sup> signaling phenotype of these two viruses had not been studied in the  
432 context of an infection. Immunofluorescence of OSUa and OSUv-infected MA104 cells  
433 at MOI 1 show a similar number of infected cells (Fig. 4A). However, while both OSUa  
434 and OSUv significantly increase the number of Ca<sup>2+</sup> spikes, the number of Ca<sup>2+</sup> spikes  
435 from OSUa-infected cells is significantly less than that of those infected with OSUv (Fig.  
436 4B & Supplementary Video Movie 5 online). To characterize this difference further, we  
437 examined single-cell traces for OSUa-and OSUv-infected cells (Fig. 4C). We found that  
438 OSUa-infected cells initially induced a low-amplitude monophasic increase in cytosolic  
439 Ca<sup>2+</sup> levels (Fig. 4C, black arrows), with the onset of the dynamic Ca<sup>2+</sup> spikes occurring  
440 several hours later (Fig. 4C, purple traces). In contrast, OSUv infection induced a much  
441 earlier onset of the dynamic Ca<sup>2+</sup> spiking, which explains the higher number of Ca<sup>2+</sup>  
442 spikes per cell (Fig. 4C, blue traces). Interestingly, OSUv may also induce an early, low-

443 amplitude increase in cytosolic  $\text{Ca}^{2+}$  in addition to the dynamic  $\text{Ca}^{2+}$  spikes, but the high  
444 number of  $\text{Ca}^{2+}$  spikes makes it difficult to clearly ascertain this in all but a few cells (Fig.  
445 4C, red arrow). Together, these data demonstrate that the dynamic  $\text{Ca}^{2+}$  signaling  
446 phenotype is a commonly feature among RV strains and potentially related to NSP4's  
447 role in dysregulating host  $\text{Ca}^{2+}$  homeostasis and virus virulence.

448

#### 449 **$\text{Ca}^{2+}$ signaling dynamics are dependent on NSP4 expression**

450 RV NSP4 is the primary mediator of elevated  $\text{Ca}^{2+}$  levels during RV infection.  
451 The differences in  $\text{Ca}^{2+}$  signaling by OSUa and OSUv observed in Fig. 4 suggest that  
452 NSP4 expression is important for the induction of the dynamic  $\text{Ca}^{2+}$  signaling during  
453 infection<sup>1</sup>. To test the role of NSP4 in these  $\text{Ca}^{2+}$  signals, we made two GCaMP6s cell  
454 lines, each stably expressing a different short-hairpin RNA that targets SA11 NSP4  
455 (NSP4 shRNA1 and NSP4 shRNA2), and a third GCaMP6s cell line stably expressing a  
456 non-targeted scrambled shRNA. Cells were infected with SA114F (MOI 0.01), and we  
457 found that cells expressing NSP4-targeted shRNAs exhibited knockdown of NSP4  
458 protein levels (Fig. 5A). We normalized NSP4 expression to GAPDH and found ~40%  
459 knockdown in cells expressing NSP4 shRNA1 and ~85% knockdown in cells expressing  
460 NSP4 shRNA2 (Fig. 5B), which correlated with reduced RV plaque size (Fig. 5C). To  
461 examine the  $\text{Ca}^{2+}$  signaling phenotype, we then infected the cells with SA114F (MOI  
462 0.1) and used live-cell imaging to measure  $\text{Ca}^{2+}$  signaling from ~2-18 hpi. The  
463 scrambled shRNA-expressing cells exhibited a similar degree of dynamic  $\text{Ca}^{2+}$  signaling  
464 as observed in parental MA104 cells (Fig. 5D, red traces), whereas knockdown of NSP4  
465 substantially decreased the degree of  $\text{Ca}^{2+}$  signaling observed (Fig. 5D, blue traces).

466 Upon quantitation, we found the number of  $\text{Ca}^{2+}$  spikes was significantly reduced in the  
467 NSP4 knockdown cells (Fig. 5E). Together, these data show that NSP4 is responsible  
468 for inducing these dynamic  $\text{Ca}^{2+}$  signals during infection.

469

#### 470 **RV-induced $\text{Ca}^{2+}$ spikes require extracellular and ER $\text{Ca}^{2+}$ pools**

471 NSP4 elevates cytosolic  $\text{Ca}^{2+}$  by activating both uptake of extracellular  $\text{Ca}^{2+}$  and  
472 release of ER  $\text{Ca}^{2+}$  pools. Thus, we next sought to characterize which pools of  $\text{Ca}^{2+}$   
473 were critical for supporting the RV-induced  $\text{Ca}^{2+}$  spikes. First, we tested whether  
474 extracellular  $\text{Ca}^{2+}$  influenced the RV-induced  $\text{Ca}^{2+}$  spikes. We infected MA104-  
475 GCaMP5G cells with SA114F (MOI 1), and at 1 HPI replaced the media with either  
476 normal media containing 2 mM  $\text{Ca}^{2+}$ , media without  $\text{Ca}^{2+}$  (supplemented with 1.8 mM  
477 EDTA), or media supplemented with  $\text{Ca}^{2+}$  for a 10 mM final concentration. The imaging  
478 data shows that decreasing extracellular  $\text{Ca}^{2+}$  strongly reduced the number and  
479 duration of  $\text{Ca}^{2+}$  signaling (Fig. 6A, light blue), whereas cells maintained in media with 2  
480 mM or 10 mM extracellular  $\text{Ca}^{2+}$  showed increased dynamic  $\text{Ca}^{2+}$  signaling (Fig. 6A, red  
481 & purple). As before, mock-infected cells in each condition exhibited little to no induction  
482 of the  $\text{Ca}^{2+}$  signaling (Fig. 6A, black lines). Quantitation of the number of  $\text{Ca}^{2+}$  spikes  
483 showed that RV-infected cells in low extracellular  $\text{Ca}^{2+}$  exhibited significantly fewer  $\text{Ca}^{2+}$   
484 spikes than that of cells in normal extracellular  $\text{Ca}^{2+}$ , but this was still greater than that  
485 of mock-infected cells (Fig. 6B). Interestingly, there was no difference in the number of  
486  $\text{Ca}^{2+}$  spikes per cell when maintained in 2 mM versus 10 mM  $\text{Ca}^{2+}$  media (Fig. 6B).  
487 However, the traces indicated that the magnitude of the  $\text{Ca}^{2+}$  spikes were greater in  
488 high  $\text{Ca}^{2+}$  media. Thus, we then determined the  $\text{Ca}^{2+}$  spike amplitude for the top 50

489  $\text{Ca}^{2+}$  spikes, and while this was highly variable from cell-to-cell, this trended to be  
490 greater with higher extracellular  $\text{Ca}^{2+}$  concentrations (Fig. 6C). Together, these data  
491 indicate that normal extracellular  $\text{Ca}^{2+}$  levels are critical for the RV-induced  $\text{Ca}^{2+}$  spikes,  
492 which could occur both through discrete  $\text{Ca}^{2+}$  influx events through the plasma  
493 membrane, and by influx of extracellular  $\text{Ca}^{2+}$  serving to maintain ER  $\text{Ca}^{2+}$  stores to  
494 feed ER  $\text{Ca}^{2+}$  release events.

495         The ER is the major intracellular  $\text{Ca}^{2+}$  store, and RV NSP4 has been shown to  
496 decrease ER  $\text{Ca}^{2+}$  levels both during infection and by recombinant expression<sup>6,7</sup>.  
497 However, controversy remains about whether RV causes a sustained depletion in ER  
498  $\text{Ca}^{2+}$ <sup>22</sup>. Thus to directly characterize the change in ER  $\text{Ca}^{2+}$  during RV infection, and  
499 determine how this relates to the dynamic cytosolic  $\text{Ca}^{2+}$  spikes, we generated an  
500 MA104 cell line co-expressing R-GECO1.2 and GCEPIAer (MA104-  
501 RGECO1/GCEPIAer), in which R-GECO1.2 is a red fluorescent cytoplasmic GECI and  
502 GCEPIAer is a green fluorescent ER-targeted GECI<sup>24,41</sup>. As above, infection with  
503 SA114F (MOI 1) induced highly dynamic cytoplasmic  $\text{Ca}^{2+}$  signaling by ~8 hpi, as  
504 illustrated in two representative single-cell traces (Fig. 7A-B, red traces; Supplementary  
505 Video 6 online). Concomitant with the onset of the cytoplasmic  $\text{Ca}^{2+}$  signaling was an  
506 equally dynamic decrease of ER  $\text{Ca}^{2+}$  that persisted throughout the rest of the infection  
507 (Fig. 7A-B, green traces). We examined the relationship between the cytoplasmic  $\text{Ca}^{2+}$   
508 spikes and ER  $\text{Ca}^{2+}$  troughs more closely from 8-12 hpi (Fig. 7B), which was during the  
509 onset of these signaling events. First, we found that the onset of  $\text{Ca}^{2+}$  signals in the  
510 cytoplasm coincided with the ER  $\text{Ca}^{2+}$  release events (Fig. 7B, black arrowheads). The  
511 persistent decrease in ER  $\text{Ca}^{2+}$  observed was driven primarily by this continuous

512 signaling, such that the ER  $\text{Ca}^{2+}$  level never recovered to the baseline level (Fig. 7A).  
513 Interestingly, a small number of ER  $\text{Ca}^{2+}$  troughs were not associated with a  
514 concomitant cytoplasmic  $\text{Ca}^{2+}$  spike (Fig. 7B, magenta arrowheads). Over the course of  
515 the long-term imaging experiment, mock-infected cells exhibited a 10% decrease in  
516 GCEPIAer fluorescence, but RV-infected cell had a 30% decrease (Fig. 7C), which  
517 occurred rapidly from 8-12 HPI (Fig. 7A). The decrease in GCEPIAer in mock-infected  
518 cells likely represents modest photobleaching of GCEPIAer over the imaging  
519 experiment.

520 During these studies, we observed that the ER-localized GCEPIAer protein is  
521 also redistributed during the RV infection, which is illustrated for a single cell in Fig. 7D-  
522 E and Supplementary Video 7. At the beginning of the imaging run (3 hpi), the  
523 GCEPIAer signal was high and localized throughout the ER in a reticular pattern (Fig.  
524 7D-E, left) but by 10.7 HPI, RV-induced  $\text{Ca}^{2+}$  signaling had decreased GCEIPAer  
525 fluorescence to its nadir (Fig. 7D-E, middle), representing a substantial decrease in ER  
526  $\text{Ca}^{2+}$ . Approximately 2 hrs after the initial decrease in ER  $\text{Ca}^{2+}$ , the GCEPIAer began  
527 accumulating into circular domains that are likely the ER-derived compartment  
528 surrounding viroplasms (Fig. 7D-E, right). These structures become more pronounced  
529 through the late stages of the infection, ~13 hpi (Fig. 7D, arrows). While the absolute  
530 onset of the ER  $\text{Ca}^{2+}$  release events was variable, the formation of viroplasm-  
531 associated membranes subsequent to the decrease in ER  $\text{Ca}^{2+}$  was a consistent  
532 pattern among RV-infected cells (Supplementary Video 7 online). Using immunostaining  
533 and deconvolution microscopy, we confirmed that the structures are viroplasms  
534 because they contain RV nonstructural protein 2 (NSP2), a major component of



535 viroplasms (Fig. 7F). Interestingly, during late stages of infection when viroplasms are  
536 forming, we detected a modest recovery in ER  $\text{Ca}^{2+}$  from its nadir (Fig. 7E), which may  
537 reflect the increased  $^{45}\text{Ca}^{2+}$  uptake previously observed<sup>22</sup>.

538

### 539 **SOCE blockers reduce RV-induced $\text{Ca}^{2+}$ spikes**

540 Since removing extracellular  $\text{Ca}^{2+}$  diminishes the RV-induced  $\text{Ca}^{2+}$  spikes (Fig.  
541 6), cellular  $\text{Ca}^{2+}$  influx pathways are critical for these  $\text{Ca}^{2+}$  signals. Several host  $\text{Ca}^{2+}$   
542 channels have been implicated in mediating  $\text{Ca}^{2+}$  entry into RV-infected cells, including  
543 SOCE channels, voltage-activated  $\text{Ca}^{2+}$  channels (VACC), and the sodium-calcium  
544 exchanger (NCX) <sup>10-12</sup>. To determine which pathway(s) were important for the dynamic  
545  $\text{Ca}^{2+}$  spikes in RV infection, we used pharmacological blockers targeting each pathway  
546 (2-APB for SOCE; D600 for VACC; KB-R7943 for NCX). MA104-GCaMP5G cells were  
547 infected with SA114F (MOI 1), and then treated with different concentrations of the  
548 blockers at 1 hpi and imaged to measure GCaMP5G fluorescence. None of the blockers  
549 exhibited cytotoxic effects to uninfected cells (data not shown). Cells treated with DMSO  
550 as a vehicle control exhibited the dynamic  $\text{Ca}^{2+}$  spikes as above (Fig. 8A, red trace). In  
551 contrast, cells treated with the SOCE blocker 2-APB exhibited a dose-dependent  
552 decrease in both the number and amplitude of the  $\text{Ca}^{2+}$  signaling (Fig. 8A, green  
553 traces). Traces from cells treated with the NCX blocker KB-R7943 showed a modest  
554 decrease in  $\text{Ca}^{2+}$  signaling (Fig. 8A, brown traces), whereas there was no difference in  
555  $\text{Ca}^{2+}$  signaling for cells treated with D600 (data not shown). We also noted that RV-  
556 infected cells treated with 10  $\mu\text{M}$  KB-R7943 underwent cell death more frequently than  
557 any other treatment, which was marked by a rapid increase in cytosolic  $\text{Ca}^{2+}$  and then

558 lysis (Fig. 8A, arrowhead); however, cell death was not observed in uninfected cells  
559 treated with KB-R7943 (data not shown). We quantitated the number of  $\text{Ca}^{2+}$  spikes per  
560 cell, which showed a significant, dose-dependent decrease in the number of  $\text{Ca}^{2+}$   
561 spikes for both 2-APB-treated (Fig. 8B, green) and, to a lesser extent, KB-R7943-  
562 treated (Fig. 8B, brown) cells, but no difference for D600-treated cells (Fig. 8B, blue).  
563 We further investigated the effects of 2-APB and KB-R7934 by examining the amplitude  
564 of the largest 50  $\text{Ca}^{2+}$  spikes of three representative cells shown in Fig. 8C-D.  
565 Treatment with 2-APB showed a dose-dependent decrease in the  $\text{Ca}^{2+}$  spike amplitude  
566 (Fig. 8C), consistent with the single-cell traces, but treatment with KB-R7943 showed no  
567 difference in spike amplitude.

568         Since elevated cytosolic  $\text{Ca}^{2+}$  is critical for RV replication, we examined RV  
569 protein levels by immunoblot to determine whether 2-APB or KB-R7943 reduced the  
570  $\text{Ca}^{2+}$  signaling by merely blocking RV or NSP4 protein synthesis or protein stability<sup>42</sup>.  
571 Immunoblot detection with an anti-RV antisera (Fig. 8E) or an anti-NSP4 specific  
572 antisera (Fig. 8F) show that none of the  $\text{Ca}^{2+}$  channel blockers caused substantial  
573 decrease in RV or NSP4 protein levels. However, we observed that 2-APB treatment  
574 significantly increased the 20 kDa unglycosylated NSP4 band (Fig. 8F) by gel  
575 densitometry analysis (Fig. 8G).

576         Overall the SOCE blocker 2-APB was the most potent inhibitor of the RV-induced  
577 dynamic  $\text{Ca}^{2+}$  signaling, so we examined the effect of other SOCE blockers that also  
578 target the Orai1  $\text{Ca}^{2+}$  channel. MA104 cells express the Orai1  $\text{Ca}^{2+}$  channel and the  
579 STIM1 and STIM2 ER  $\text{Ca}^{2+}$  sensors, which are the core machinery for the SOCE  
580 pathway (Fig. 9A). While MA104 cells also express the Orai3  $\text{Ca}^{2+}$  channel, this isoform

581 is not activated by ER Ca<sup>2+</sup> store depletion but arachidonic acid and leukotrienes<sup>43</sup>. We  
582 tested four SOCE blockers (2-APB, BTP2, Synta66, and GSK7975A) for the ability to  
583 block thapsigargin-induced SOCE and found that all of them showed a similar inhibition  
584 of Ca<sup>2+</sup> entry after ER store depletion (Fig. 9B). Thus, we treated SA114F-infected  
585 MA104-GCaMP5G cells with each of these blockers at ~1hpi and performed Ca<sup>2+</sup>  
586 imaging to measure the RV-induced Ca<sup>2+</sup> spikes (Fig. 9C-D). Representative single-cell  
587 traces illustrate that all the SOCE blockers inhibited the RV-induced dynamic Ca<sup>2+</sup>  
588 signaling (Fig. 9C) and significantly inhibited the number of Ca<sup>2+</sup> spikes per cell (Fig.  
589 9D). The blockers displayed varying degrees of potency but 2-APB and BTP2 treatment  
590 caused the greatest decrease in RV-induced Ca<sup>2+</sup> signaling (Supplementary Video 8  
591 online). Further, we found that treatment with the SOCE blockers significantly reduced  
592 RV yield from MA104 cells (Fig. 9E), which is consistent with the importance of elevated  
593 cytosolic Ca<sup>2+</sup> for RV replication<sup>29</sup>. As with the other Ca<sup>2+</sup> channel blockers, we  
594 examined whether the SOCE blockers affected viral protein levels by immunoblot. As  
595 above, we found that 2-APB treatment increased the abundance of the 20 kDa  
596 unglycosylated NSP4 band (NSP4-20), and Synta66 treatment also caused a modest  
597 increase in NSP4-20 (Fig. 9F). In contrast to the other SOCE blockers, BPT2 treatment  
598 caused an overall decrease in RV proteins, which correlates with the strong  
599 suppression of RV-induced Ca<sup>2+</sup> signaling during the infection (Fig. 9D & 9F). Together,  
600 these data support the previous observation that shRNA knockdown of the Ca<sup>2+</sup> sensor  
601 STIM1 reduces RV replication, and further show that Ca<sup>2+</sup> influx *via* SOCE channels is  
602 critical for RV-induced Ca<sup>2+</sup> signaling and replication<sup>10</sup>.  
603

604 **Human intestinal enteroid characterization of RV-induced Ca<sup>2+</sup> signaling**

605         Although MA104 cells provide a robust model for RV replication and form a  
606 single epithelial sheet ideal for microscopy studies, they are neither of human nor of  
607 intestinal cell origin. Human intestinal enteroids (HIEs) have been developed as a model  
608 *in vitro* system of the epithelial cells of the small intestine, and support RV infection and  
609 replication, particularly for human RV strains<sup>26,44</sup>. HIEs are grown in “mini-gut” three-  
610 dimensional (3D) cultures from human intestinal stem cells and are non-transformed  
611 cells, which make them a biologically relevant system to study the GI epithelium<sup>45</sup>.  
612 Thus, we sought to determine if the dynamic cytosolic Ca<sup>2+</sup> signaling observed in  
613 MA104 cells were also observed in HIEs with RV infection.

614         We created jejunum HIEs stably expressing the green cytoplasmic GEC1  
615 GCaMP6s (jHIE-GCaMP6s) using lentivirus transduction. To test the response of  
616 GCaMP6s to cytoplasmic Ca<sup>2+</sup> in the enteroids, we treated 3D jHIE-GCaMP6s stabilized  
617 in a diluted Matrigel, with carbachol, a known Ca<sup>2+</sup> agonist. Carbachol treatment of jHIE-  
618 GCaMP6s significantly increased GCaMP6s fluorescence 200-300% over the mock-  
619 treated jHIE-GCaMP6s (Fig. 10A-C). Thus, jHIE-GCaMP6s enteroids functionally report  
620 changes in cytoplasmic Ca<sup>2+</sup> and can be used to examine RV-induced Ca<sup>2+</sup> signaling.

621         We next tested if 3D jHIE-GCaMP6s enteroids would exhibit similar Ca<sup>2+</sup>  
622 dynamics during RV infection as observed in MA104-GCaMP5G cells. jHIE-GCaMP6s  
623 enteroids were mock- or RV-infected with the human RV strain Ito, seeded into chamber  
624 slides in diluted Matrigel, and imaged every 2-3 minutes for phase contrast and  
625 GCaMP6s fluorescence throughout the RV infection (~16 hrs). At 24 hpi, the HIEs were  
626 fixed and immunostained for RV antigens to confirm successful infection, which is

627 evident by both infected cells within the HIEs as well as strong positive staining of the  
628 dead cells sloughed from the HIEs (Fig. 10D). Examination of the  $\text{Ca}^{2+}$  signaling  
629 showed little  $\text{Ca}^{2+}$  signaling activity in the mock-infected jHIE-GCaMP6s enteroids, but  
630 RV-infected enteroids exhibited significantly increased  $\text{Ca}^{2+}$  dynamics, as illustrated in  
631 representative traces from three mock- or RV-infected HIEs (Fig. 10E and  
632 Supplementary Video 9 online). Similar to the  $\text{Ca}^{2+}$  signaling observed in MA104 cells,  
633 initially there were no or only modest changes in cytosolic  $\text{Ca}^{2+}$ , and the onset of strong  
634 and dynamic  $\text{Ca}^{2+}$  signals occurred ~8-10 HPI. For HIEs it was not possible to  
635 accurately measure  $\text{Ca}^{2+}$  signaling at the single-cell level. We were able to track and  
636 measure  $\text{Ca}^{2+}$  signaling over the entire jHIE-GCaMP6s enteroid and quantify these  
637 changes as  $\text{Ca}^{2+}$  spikes/enteroid. We found that RV significantly increased the number  
638 of  $\text{Ca}^{2+}$  spikes/enteroid (Fig. 10F) and that the  $\text{Ca}^{2+}$  spike amplitudes are also  
639 substantially greater in RV-infected than in mock-infected jHIE-GCaMP6s enteroids  
640 (Fig. 10G). Thus, the RV-induced  $\text{Ca}^{2+}$  signaling in enteroids closely parallels that  
641 observed in MA104 cells and demonstrate that these dynamic  $\text{Ca}^{2+}$  signals are a  
642 biologically relevant aspect of how RV disrupts host  $\text{Ca}^{2+}$  homeostasis.

643         Since SOCE played a prominent role in the RV-induced dynamic  $\text{Ca}^{2+}$  signaling  
644 in MA104 cells, we investigated whether it was also critical for the  $\text{Ca}^{2+}$  signaling  
645 observed in HIEs. Similar to MA104 cells, jejunum-derived HIEs expressed the core  
646 SOCE proteins Orai1, STIM1, and STIM2, as well as the non-store operated Orai3  
647 channel (Fig. 11A). The expression levels were not substantially altered by  
648 differentiating the jHIEs through removal of growth factors. To test whether SOCE is  
649 important for RV-induced  $\text{Ca}^{2+}$  signaling, we first tested 2-APB treatment of 3D jHIE-

650 GCaMP6s enteroids either mock- or RV-infected with strain Ito. While RV infection  
651 increased the number of  $\text{Ca}^{2+}$  spikes per enteroid consistent with above (Fig. 11B), 2-  
652 APB treatment did not attenuate the  $\text{Ca}^{2+}$  signaling (Fig.11B-C). We speculated that the  
653 3D format or the Matrigel used to support 3D HIEs might interfere with 2-APB blocking  
654 SOCE, so we repeated these studies using jHIE-GCaMP6s monolayers. First, we  
655 confirmed that 2-APB can block thapsigargin-induced SOCE in jHIE-GCaMP6s  
656 monolayers, which exhibited a 32% reduction in  $\text{Ca}^{2+}$  re-entry after store depletion (Fig.  
657 11D). Interestingly, 2-APB shows a much less potent block of SOCE in enteroids than in  
658 MA104 cells, which exhibited a >80% inhibition of  $\text{Ca}^{2+}$  re-entry after store depletion  
659 (Fig. 9C). We also tested if VACC or NCX may contribute to RV-induced  $\text{Ca}^{2+}$  signaling  
660 in enteroids, but treatment with D600 or KB-R7943 did not reduce  $\text{Ca}^{2+}$  spikes in RV-  
661 infected jHIE-GCaMP6s monolayers (Fig. 11E). Nevertheless, 2-APB treatment of both  
662 mock-inoculated (Fig. 11F, black vs. grey traces) and RV-infected jHIE-GCaMP6s  
663 monolayers (Fig. 11F, red vs. blue traces) reduced the observed  $\text{Ca}^{2+}$  signaling, as  
664 illustrated in the representative traces (see Supplementary Video 10 online). We  
665 quantitated the  $\text{Ca}^{2+}$  signaling per FOV and confirmed that 2-APB treatment significantly  
666 reduced the number of  $\text{Ca}^{2+}$  spikes for both mock and RV-infected enteroids (Fig. 11G),  
667 as well as substantially reducing the amplitude of the  $\text{Ca}^{2+}$  signals (Fig. 11H). Thus, like  
668 the MA104 model, SOCE is critical for supporting the dynamic  $\text{Ca}^{2+}$  signaling induced in  
669 RV-infected jHIEs.

670 **Discussion**

671 A hallmark of RV infection, and several other viruses, is an elevation in cytosolic  
672  $\text{Ca}^{2+}$  and decrease in ER  $\text{Ca}^{2+}$  stores, which facilitates virus replication and contributes  
673 to pathogenesis through a variety of downstream pathways<sup>1,46</sup>. The importance of RV-  
674 induced dysregulation of  $\text{Ca}^{2+}$  levels for many of these downstream pathways has been  
675 determined, but thus far characteristics of the  $\text{Ca}^{2+}$  signaling itself have not been  
676 extensively investigated<sup>1,5</sup>. Thus, the primary goal of this study was to determine the  
677 nature of the RV-induced elevation in cytosolic  $\text{Ca}^{2+}$  and characterize how the  
678 dysregulation of  $\text{Ca}^{2+}$  signaling manifests during the infection. By leveraging GECI-  
679 expressing cell lines to perform long-term  $\text{Ca}^{2+}$  imaging, we found that RV induces a  
680 vast increase in  $\text{Ca}^{2+}$  signaling events that increased in frequency and magnitude over  
681 the course of the infection. These results are consistent with previous measurements of  
682 cytosolic  $\text{Ca}^{2+}$  in RV-infected cells that show a monophasic increase over time, which is  
683 similar to our imaging data when it is averaged out across the whole FOV (*i.e.*, a cell  
684 population). Yet, what is paradigm changing is that at the individual cell level, RV does  
685 not merely cause a steady increase in cytosolic  $\text{Ca}^{2+}$ , but rather activates a cacophony  
686 of discrete  $\text{Ca}^{2+}$  signaling events. Further, by generating GECI-expressing HIEs, this  
687 study is the first characterization of RV-mediated  $\text{Ca}^{2+}$  signaling in normal, human small  
688 intestinal enterocytes. We found that the prominence of the  $\text{Ca}^{2+}$  spikes in RV-infected  
689 HIEs is similar to that in MA104 cells, underlining that this is a biologically relevant  
690 phenomenon.

691 The characterization of the RV-induced increase in cytosolic  $\text{Ca}^{2+}$  as a series of  
692 discrete, transient  $\text{Ca}^{2+}$  signals is an important new insight into the cellular

693 pathophysiology of RV infection. Transient increases in cytosolic  $\text{Ca}^{2+}$  serve as pro-  
694 survival signals by activating phosphoinositide 3-kinase (PI3K) and by calcineurin-  
695 dependent NFAT activation. Further,  $\text{Ca}^{2+}$  oscillations stimulate mitochondrial  $\text{Ca}^{2+}$   
696 uptake that enhances ATP synthesis, and this increase in mitochondrial metabolism  
697 contributes to cell survival pathways. In contrast, strong sustained elevation of cytosolic  
698  $\text{Ca}^{2+}$  drives pro-apoptotic signaling through mitochondrial  $\text{Ca}^{2+}$  overload<sup>20</sup>. Thus, even  
699 though the mean cytosolic  $\text{Ca}^{2+}$  level is progressively increasing in the RV-infected cell,  
700 early activation of the intrinsic apoptotic cascade may be prevented because it occurs  
701 as hundreds of transient  $\text{Ca}^{2+}$  signals over hours. This premise is consistent with  
702 studies showing that early activation of PI3K during RV infection delays apoptosis<sup>47</sup>.  
703 Concomitantly, the elevated  $\text{Ca}^{2+}$  signaling activates cellular pathways, such as  
704 autophagy, that promote RV replication and assembly of progeny virus<sup>29</sup>. Whether the  
705 initial  $\text{Ca}^{2+}$  dynamics enhance mitochondria bioenergetics or ATP synthesis early during  
706 RV infection has not been studied, but a loss of mitochondria membrane potential and  
707 decrease in ATP output occur at late stages of infection<sup>47,48</sup>. Ultimately the massive  
708 increase in  $\text{Ca}^{2+}$  signaling damages the cell and triggers cell death, and cell lysis was  
709 observed in our time-lapse imaging, but this data cannot differentiate whether this was  
710 through apoptosis, necrosis, and/or pyroptosis<sup>18,47,49</sup>. Thus, RV exploitation of discrete  
711  $\text{Ca}^{2+}$  signals, rather than a sustained increase in cytosolic  $\text{Ca}^{2+}$ , may function in concert  
712 with other RV anti-apoptotic proteins, such as NSP1, to forestall the onset of cell death  
713 and enable sustained viral replication.

714           Due to GEC1 photostability, we were, for the first time, able to perform  $\text{Ca}^{2+}$   
715 imaging of individual cells throughout the RV infection. The increased  $\text{Ca}^{2+}$  spikes are



716 the predominant feature of this imaging, and the SA11-mRuby reporter virus  
717 demonstrates that the onset of the increased  $\text{Ca}^{2+}$  signaling correlates with RV protein  
718 synthesis as well as input virus dose. Yet, despite individual cells exhibiting very distinct  
719  $\text{Ca}^{2+}$  signaling traces, a general pattern emerges: [i] early in infection  $\text{Ca}^{2+}$  signaling  
720 remains at basal levels; [ii] onset of increased  $\text{Ca}^{2+}$  signaling is characterized by low-  
721 amplitude  $\text{Ca}^{2+}$  spikes relatively; and then [iii] very high-amplitude  $\text{Ca}^{2+}$  spikes become  
722 predominant, which results in elevated cytosolic  $\text{Ca}^{2+}$  levels. The progression of the RV-  
723 induced  $\text{Ca}^{2+}$  signals have important implications for characterizing how  $\text{Ca}^{2+}$ -regulated  
724 cellular processes are influenced by RV infection. For example, RV induces autophagy  
725 through increased cytosolic  $\text{Ca}^{2+}$ , thereby activating calcium/calmodulin-dependent  
726 kinase kinase- $\beta$  (CaMKK $\beta$ )<sup>29</sup>. This raises several questions: *When* after onset of the  
727 aberrant  $\text{Ca}^{2+}$  signaling is CaMKK $\beta$  activated? *How many*  $\text{Ca}^{2+}$  signals are needed to  
728 induce autophagy? Similar questions can be asked about the role of these  $\text{Ca}^{2+}$  signals  
729 in RV-induced apoptosis, cytoskeletal rearrangement, and serotonin and chloride  
730 secretion<sup>26,47,50,51</sup>. Tracking these dynamic relationships poses a challenge that may be  
731 addressed by further engineering GECI-expressing cell lines/HIEs to express other  
732 biosensors such that both processes can be measured throughout the infection.

733 Many studies show that RV infection (or NSP4 expression) reduces the ER  $\text{Ca}^{2+}$   
734 stores based on a blunted cytosolic  $\text{Ca}^{2+}$  release in response to agonists (e.g., ATP) or  
735 thapsigargin treatment to prevent SERCA-mediated refilling<sup>22,52</sup>. However, other results  
736 show increased in radioactive  $^{45}\text{Ca}^{2+}$  loading into the ER in RV-infected cells, which is  
737 hypothesized to be due to an increase in  $\text{Ca}^{2+}$  binding proteins (e.g., VP7 or ER  
738 chaperone proteins)<sup>7,11</sup>. Thus, controversy remains about whether RV causes a

739 decrease in the ER Ca<sup>2+</sup> store. To address this question, we developed MA104-  
740 RGECO1.2/GCEPIAer cells to directly measure cytosolic and ER Ca<sup>2+</sup> together during  
741 the RV infection. RV induces a dynamic decrease in ER Ca<sup>2+</sup> levels that occurs in  
742 conjunction with the increase in cytosolic Ca<sup>2+</sup> signaling. In most instances, the cytosolic  
743 Ca<sup>2+</sup> spike correlated with a decrease in ER Ca<sup>2+</sup>, indicating release of ER Ca<sup>2+</sup>  
744 substantially contributes to the increased cytosolic Ca<sup>2+</sup> signaling. Further, despite the  
745 30% reduction in steady-state ER Ca<sup>2+</sup>, the dynamic nature of the ER Ca<sup>2+</sup> signaling  
746 suggests that SERCA pumps continually work to refill the ER. The observed depletion  
747 of ER Ca<sup>2+</sup> levels is consistent with the blunted cytosolic response to Ca<sup>2+</sup> agonists like  
748 ATP, the NSP4 function as a Ca<sup>2+</sup>-conducting viroporin in the ER, and the activation of  
749 the ER Ca<sup>2+</sup> sensor STIM1<sup>7,9,10</sup>. In contrast, it is more difficult to reconcile the previously  
750 observed increase in <sup>45</sup>Ca<sup>2+</sup> loading into the ER with the 30% reduction in steady-state  
751 ER Ca<sup>2+</sup> levels detected by GCEPIAer imaging in this study. It has been hypothesized  
752 that increased <sup>45</sup>Ca<sup>2+</sup> loading may be due to increased ER Ca<sup>2+</sup> buffering capacity,  
753 caused by the high levels of RV VP7 and/or chaperones BiP and endoplasmic<sup>11</sup>.  
754 However, our data suggest this is unlikely to be the case because this would sequester  
755 Ca<sup>2+</sup> and render GCEPIAer unresponsive to changes in ER Ca<sup>2+</sup><sup>24</sup>, yet this is not the  
756 case because GCEPIAer remains dynamic throughout the infection. Alternatively, the  
757 increase <sup>45</sup>Ca<sup>2+</sup> may reflect loading into the ER-derived autophagy-like microdomains  
758 that surround viroplasm, which we observed form after the initial depletion in ER Ca<sup>2+</sup>  
759 and during a partial recovery of ER stores<sup>29,53</sup>. These ER microdomains are the site  
760 VP7 assembly onto nascent RV particles, which requires high Ca<sup>2+</sup>, so Ca<sup>2+</sup>  
761 sequestration in these microdomains may occur independently of the rest of the ER.

762 Future studies using GCEPIAer and viroplasm-targeted GECIs are needed to determine  
763 whether the ER and viroplasm-associated membranes are functionally distinct  
764 compartments.

765 The pleiotropic functions of NSP4 are responsible for the RV-mediated  
766 dysregulation of host  $\text{Ca}^{2+}$  homeostasis through the ion channel function of iNSP4 and  
767  $\text{Ca}^{2+}$  agonist function of the secreted eNSP4 enterotoxin<sup>5,9,10</sup>. Our data show that NSP4  
768 governs the dynamic  $\text{Ca}^{2+}$  signaling induced by RV infection since NSP4 knockdown  
769 significantly abrogated the number and amplitude of the  $\text{Ca}^{2+}$  spikes. Unfortunately, it is  
770 not possible to determine the relative roles of iNSP4 versus eNSP4 in the induction of  
771 the  $\text{Ca}^{2+}$  spikes from these data because the shRNA decreased total NSP4 synthesis,  
772 and therefore both pathways would be attenuated. The importance of NSP4 for the  $\text{Ca}^{2+}$   
773 signaling is also demonstrated by the extremely different  $\text{Ca}^{2+}$  signaling profiles of  
774 OSUa- and OSUv-infected cells. These differences correlate with the attenuated  
775 elevation of cytosolic  $\text{Ca}^{2+}$  caused by recombinant OSUa NSP4 both when expressed in  
776 Sf9 cells (*i.e.*, iNSP4) and exogenous treatment of cells (*i.e.*, eNSP4)<sup>40</sup>. The attenuated  
777 NSP4 phenotype is the result of mutations in the NSP4 enterotoxin domain, indicating  
778 that this domain is critical for induction of the  $\text{Ca}^{2+}$  spikes by OSU<sup>25,40</sup>. However, it is  
779 important to note that these two viruses are not isogenic so the genetic backgrounds of  
780 the OSUa and OSUv NSP4 are different, requiring further  $\text{Ca}^{2+}$  imaging studies using  
781 recombinant RV bearing these attenuating NSP4 mutations to fully dissect the relative  
782 importance iNSP4- and eNSP4-mediated  $\text{Ca}^{2+}$  signaling.

783 NSP4 is the trigger of the dynamic  $\text{Ca}^{2+}$  signaling, yet these signals are  
784 maintained through host  $\text{Ca}^{2+}$  channels and signaling pathways both in the ER and PM.

785 Removal of extracellular  $\text{Ca}^{2+}$  significantly attenuated the  $\text{Ca}^{2+}$  spikes, demonstrating  
786 that  $\text{Ca}^{2+}$  influx is crucial for these signals. Three classes of  $\text{Ca}^{2+}$  channels (SOCE,  
787 NCX, and VACC) have been implicated RV-induced  $\text{Ca}^{2+}$  influx<sup>10-12,23</sup>. Our results using  
788 different pharmacological blockers indicate SOCE is the primary  $\text{Ca}^{2+}$  influx pathway  
789 that supports the RV-induced dynamic  $\text{Ca}^{2+}$  spikes, both in MA104 cells and in HIEs.  
790 Blocking SOCE significantly reduced the number and amplitude of the RV-induced  $\text{Ca}^{2+}$   
791 spikes. However, the Orai1 SOCE channel is a very low conductance channel so  $\text{Ca}^{2+}$   
792 entry through PM Orai1 is unlikely to generate the high amplitude  $\text{Ca}^{2+}$  spikes observed  
793 during RV infection. The nature of the  $\text{Ca}^{2+}$  spikes, and the fact that most of them  
794 coincide with ER  $\text{Ca}^{2+}$  troughs, indicates that the signals detected are ER  $\text{Ca}^{2+}$ -release  
795 events. ER  $\text{Ca}^{2+}$  release could occur either through iNSP4 or activation of the IP<sup>3</sup>-  
796 Receptor  $\text{Ca}^{2+}$  channel, and SOCE serves to maintain these signals by sustaining ER  
797  $\text{Ca}^{2+}$  refilling. Since elevated  $\text{Ca}^{2+}$  levels are critical for RV replication, the attenuated  
798  $\text{Ca}^{2+}$  signaling caused by the SOCE blockers significantly reduced RV yield<sup>29</sup>.  
799 Interestingly, blocking SOCE in HIEs significantly reduced the  $\text{Ca}^{2+}$  spikes, but the  
800 effect was less pronounced than in MA104 cells, suggesting other pathway(s) may exist  
801 that support RV-induced  $\text{Ca}^{2+}$  spikes in HIEs.

802 In summary, RV dysregulates host  $\text{Ca}^{2+}$  homeostasis by a massive and  
803 progressive increase in discrete  $\text{Ca}^{2+}$  signaling events, mainly from ER  $\text{Ca}^{2+}$  release.  
804 Many viruses elevate cytosolic  $\text{Ca}^{2+}$  and alter ER  $\text{Ca}^{2+}$ , leading us to question whether  
805 dynamic  $\text{Ca}^{2+}$  spikes, as seen in RV infection, is a common manifestation for virus-  
806 induced  $\text{Ca}^{2+}$  signaling. If so, the host channels that support these  $\text{Ca}^{2+}$  signals, such as

807 Orai1, may represent novel targets for broadly acting host-directed antiviral  
808 therapeutics.

809 **Acknowledgments.** We would like to thank Dr. Lennart Svensson and Dr. Marie Hagbom for  
810 sharing their stocks of the porcine OSUa and OSUv viruses. This work was supported in part by  
811 NIH grants K01DK093657, R03DK110270, R01DK115507 (PI: J. M. Hyser), and R01AI080656  
812 and U19AI116497 (PI: M. K. Estes). Trainee support for A.C.G. was provided by NIH grants  
813 F30DK112563 (PI: A.Chang-Graham) and the BCM Medical Scientist Training Program and  
814 support for both A.C.G. and A.C.S was provided by the Integrative Molecular and Biomedical  
815 Sciences Graduate Program (T32GM008231, PI: D. Nelson). This project was supported in part  
816 by PHS grant P30DK056338, which supports the Texas Medical Center Digestive Diseases  
817 Center (TMC-DDC) Gastrointestinal Experimental Model Systems (GEMS) Core and the  
818 Cellular and Molecular Morphology Core. Funding support for the BCM Integrated Microscopy  
819 Core includes the NIH (DK56338, CA125123), CPRIT (RP150578, RP170719), the Dan L.  
820 Duncan Comprehensive Cancer Center, and the John S. Dunn Gulf Coast Consortium for  
821 Chemical Genomics. We would like to thank Xi-Lei (Shelly) Zeng and Xiaomin Yu for their help  
822 with enteroid cultures and media, and Drs. Michael Mancini and Fabio Stossi for deconvolution  
823 microscopy assistance. FACS sorting of cell lines utilized the BCM Cytometry and Cell Sorting  
824 Core with funding from the CPRIT Core Facility Support Award (CPRIT-RP180672), the NIH  
825 (CA125123 and RR024574), and the expert assistance of Joel M. Sederstrom.

826

827 **Author Contributions.** JH, ACG, JP, AS, JC and MKE designed the experiments and  
828 discussed the data. JH, ACG, JP, NR, and AS conducted the calcium imaging experiments and  
829 analyzed the data with JH and ACG. JC and MKE provided key reagents including the shRNA  
830 knockdown cells. JP conducted the western blot and plaque assays and analyzed data with JH.  
831 AS and ACG conducted and analyzed qPCR experiments. JH and ACG wrote the manuscript,  
832 and all authors contributed to revisions of the paper.

833

834 **Figures**

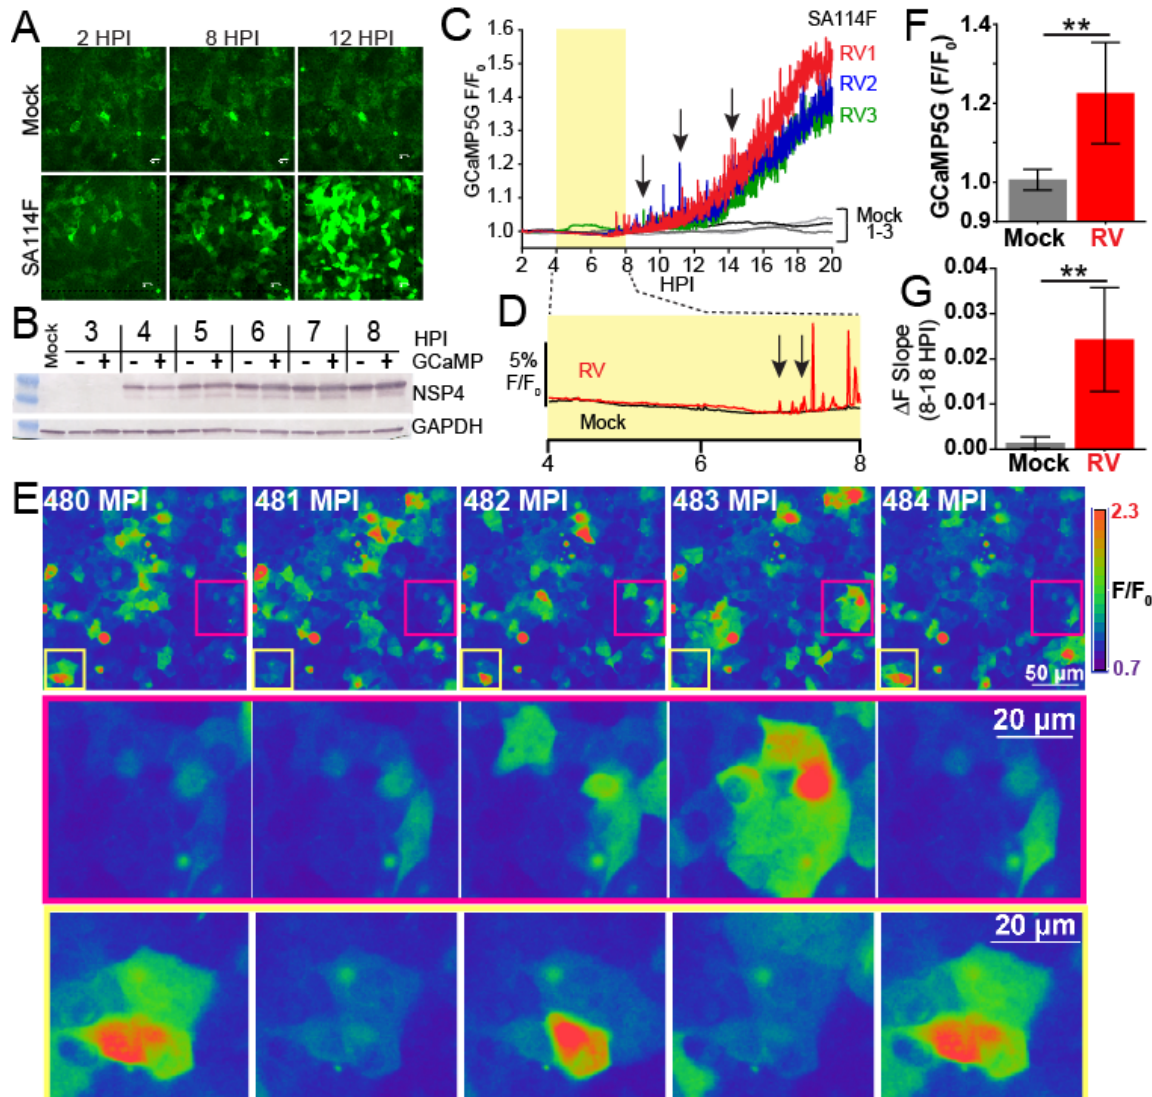

835  
 836 **Figure 1. RV-induced increase in cytosolic Ca<sup>2+</sup> manifests as increased Ca<sup>2+</sup> signaling**  
 837 **dynamics. (A)** Epifluorescence images of mock (upper) or SA114F-infected (MOI 10) MA104-  
 838 GCaMP5G cells at 2, 8, and 12 hours post-infection (HPI). **(B)** Western blot of RV NSP4  
 839 expression in MA104 cells without (-) or with (+) GCaMP5G from 3-8 HPI. Western blot for  
 840 GAPDH serves as a loading control. **(C)** GCaMP5G fluorescence (F/F<sub>0</sub>) for three fields-of-view  
 841 (~455 μm<sup>2</sup>) each of mock (black and grey lines) or RV-infected (red, blue, and green) MA104-  
 842 GCaMP5G cells from 2-20 HPI. Increased frequency of transient Ca<sup>2+</sup> fluxes (arrows) highlight  
 843 the increased Ca<sup>2+</sup> signaling dynamics. **(D)** Expanded graph of relative GCaMP5G (F/F<sub>0</sub>) of  
 844 representative Mock (black) and RV-infected (red) cells. Arrows indicate the increased  
 845 low/moderate amplitude Ca<sup>2+</sup> signals present during the initial increase in steady-state cytosolic  
 846 Ca<sup>2+</sup>. **(E)** Examples of the dynamic Ca<sup>2+</sup> signaling. GCaMP5G fluorescence pseudocolored by  
 847 intensity from 480-484 minutes post-infection (MPI). Regions in the magenta and yellow boxes  
 848 are magnified below. **(F)** Average GCaMP5G fluorescence from 18-19 HPI and **(G)** slope of  
 849 GCaMP5G ΔF from 8-18 HPI. Data shown as mean ± SD from 12 fields-of-view (triplicate of four  
 850 independent experiments). \*\*p<0.01

851

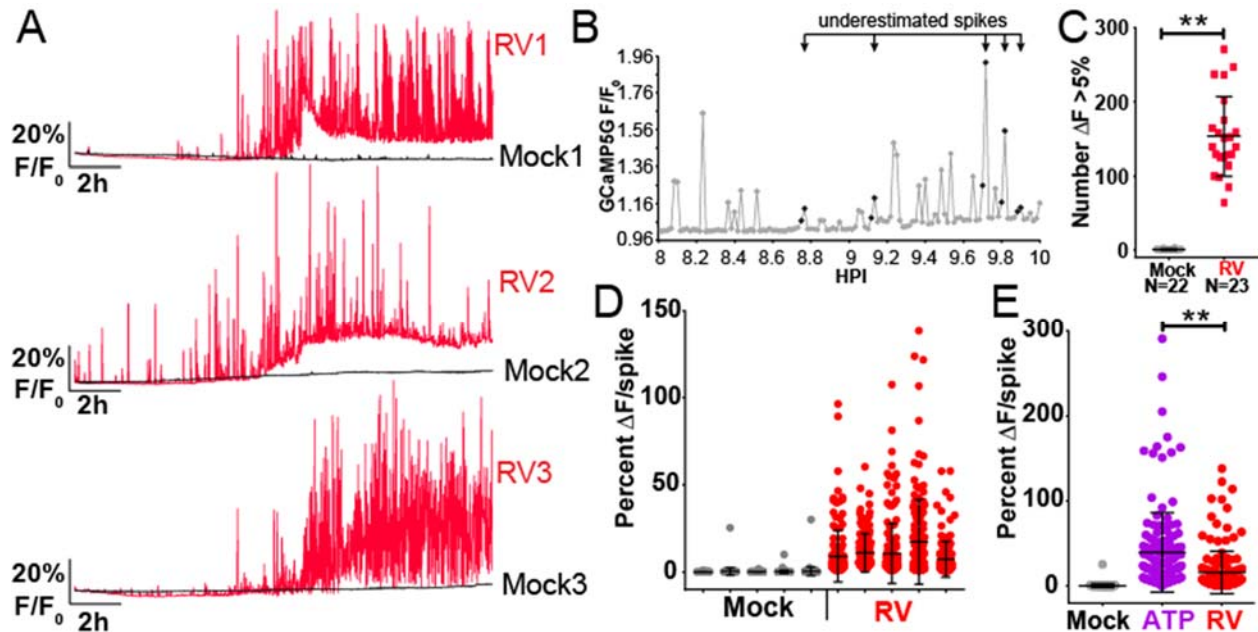

852

853

854 **Figure 2. RV increases the number and amplitude of Ca<sup>2+</sup> spikes at the single-cell level.**

855 **(A)** GCaMP5G (F/F<sub>0</sub>) fluorescence traces from three representative single mock (black) or RV-

856 infected (red) MA104-GCaMP5G cells. **(B)** GCaMP5G fluorescence (F/F<sub>0</sub>) of a single RV-

857 infected MA104-GCaMP5G cell from 8-10 HPI. Symbols in magenta denote Ca<sup>2+</sup> spikes

858 captured in two data points and potentially underestimated by counting spikes as ΔF > 5%. **(C)**

859 MA104-GCaMP5G cells mock or RV infected (MOI 10), GCaMP5G fluorescence was imaged

860 from 2-20 HPI and the number of Ca<sup>2+</sup> spikes (ΔF > 5%) individual cells was determined. **(D)**

861 Ca<sup>2+</sup> spike amplitude of the top 150 Ca<sup>2+</sup> spikes from five representative mock and RV-infected

862 cells. **(E)** GCaMP5G Ca<sup>2+</sup> response to 50 μM ATP in comparison to mock or RV infection. Data

863 shown as mean ± SD. \*\*p < 0.01



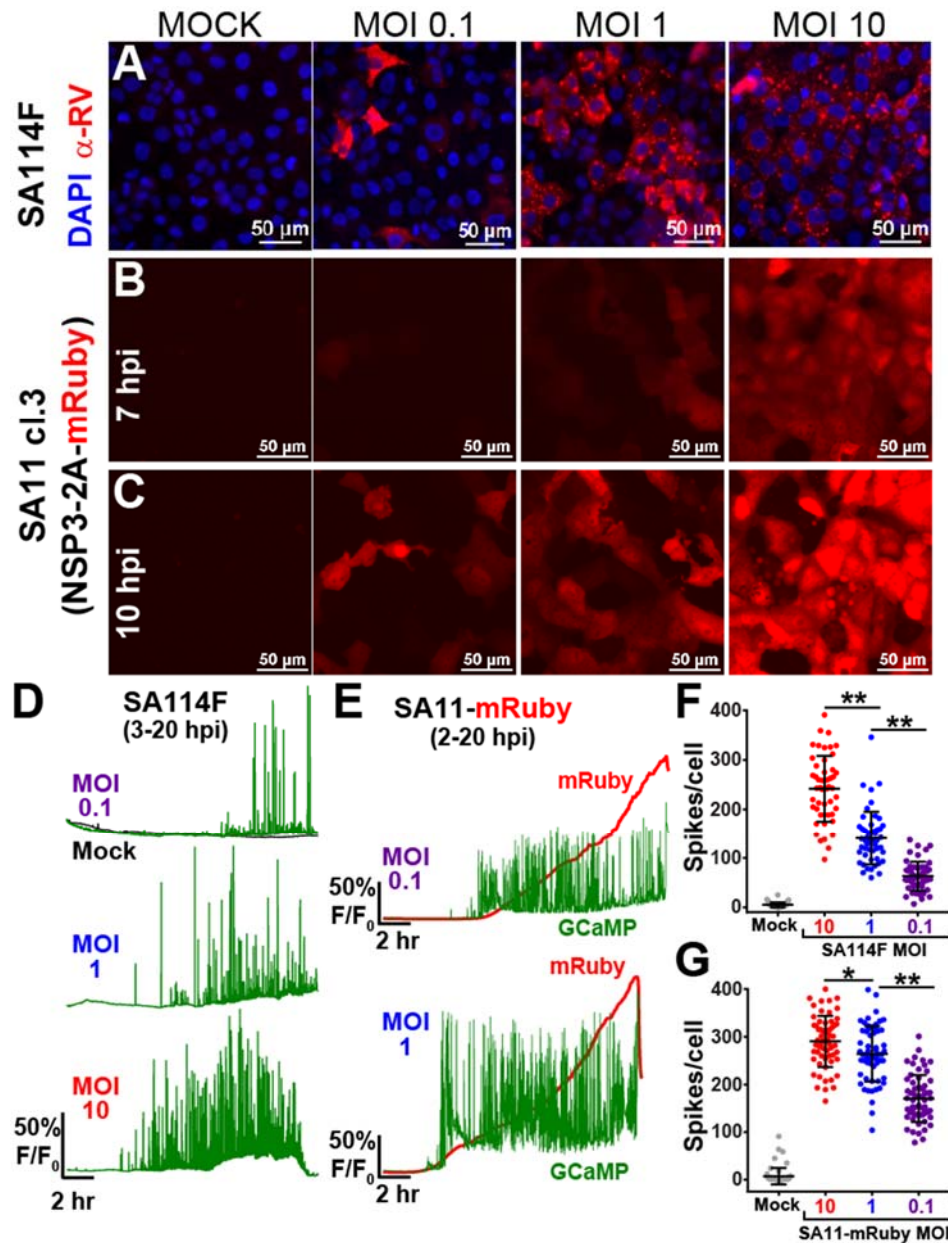

864  
865  
866  
867  
868  
869  
870  
871  
872  
873  
874  
875  
876  
877  
878

**Figure 3. RV-induced dynamic Ca<sup>2+</sup> signaling is related to virus dose. (A)**

Immunofluorescence images of mock or SA114F-infected MA104-GCaMP5G cells that were inoculated with increasing MOI (0.1, 1, or 10). RV antigen (red) is detected at ~8 hpi with anti-RV polyclonal antisera and nuclei are stained with DAPI (blue). (B-C) Epifluorescence images of MA104-GCaMP5G cells mock or infected with recombinant SA11-mRuby reporter virus with increasing MOIs (0.1, 1, 10). Images were captured at 7 HPI (B) or 10 HPI (C). (D) Representative single-cell traces of relative GCaMP5G fluorescence (F/F<sub>0</sub>) from cells mock (black) or RV infected by SA114F with MOIs of 0.1 (purple), 1 (blue), 10 (red). (E) Representative single-cell traces of relative fluorescence (F/F<sub>0</sub>) of GCaMP5G (green) and mRuby (red) from cells infected by SA11-mRuby MOI 0.1 (purple) or 1 (blue). (F-G) Number of Ca<sup>2+</sup> spikes (F/F<sub>0</sub> > 5%) from mock or RV-infected cells that were infected with SA114F (F) or SA11-mRuby (G). Data shown as mean ± SD of 60 cells/condition. \*\*p < 0.01

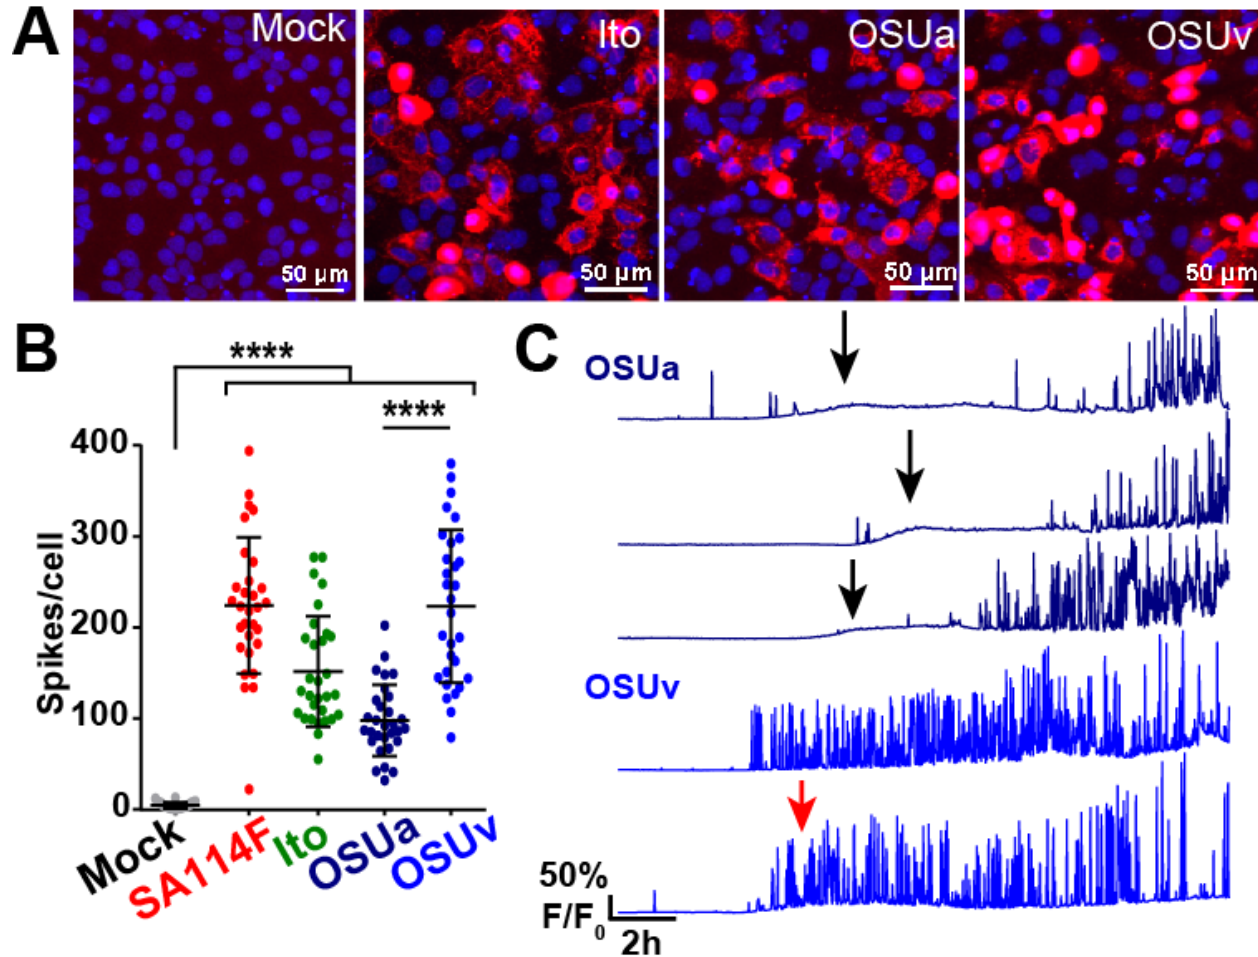

879  
880 **Figure 4. Dynamic  $\text{Ca}^{2+}$  signaling is induced by several other RV strains. (A)**  
881 Immunofluorescence images of MA104-GCaMP5G cells mock or infected by human RV strain  
882 Ito, porcine OSUa, or porcine OSUv at MOI 1. RV antigen (red) is detected at ~8 hpi with anti-  
883 RV polyclonal antisera and nuclei are stained with DAPI (blue). **(B)** Number of  $\text{Ca}^{2+}$  spikes ( $F/F_0$   
884  $> 5\%$ ) from mock or RV-infected cells inoculated with MOI1 of the strains listed. Data shown as  
885 mean  $\pm$  SD of 30 cells/condition. \*\*\*\* $p < 0.0001$ . **(C)** Representative single-cell traces of relative  
886 GCaMP5G fluorescence ( $F/F_0$ ) from cells infected by OSUa (purple) or OSUv (blue). A slight  
887 increase in the steady-state  $\text{Ca}^{2+}$  level is exhibited by most OSUa-infected (black arrows) and  
888 some OSUv-infected (red arrow) cells.  
889

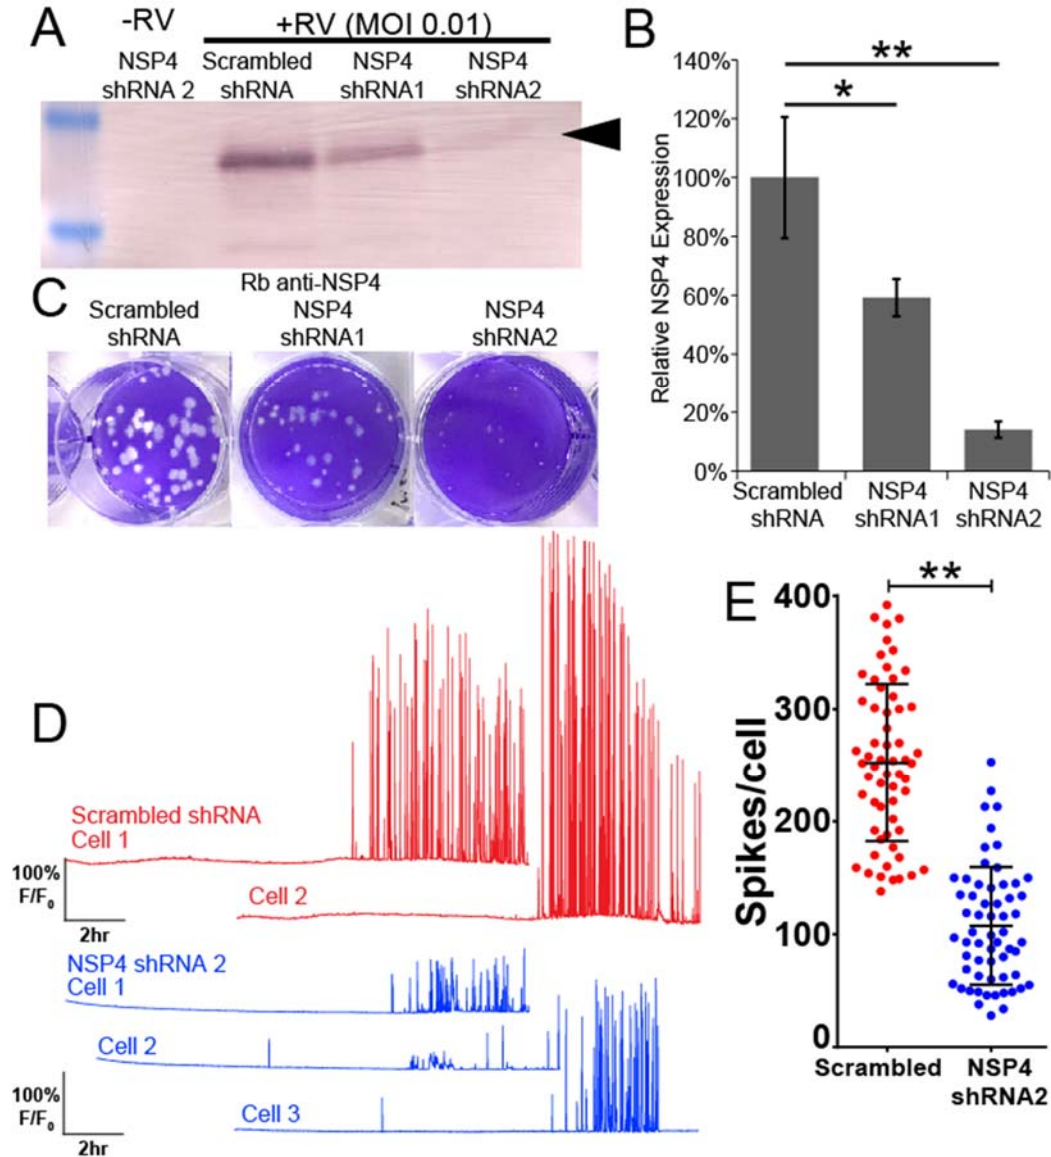

890  
 891  
 892  
 893  
 894  
 895  
 896  
 897  
 898  
 899  
 900  
 901  
 902  
 903

**Figure 5. Knockdown of NSP4 reduces the dynamic Ca<sup>2+</sup> signaling.** (A) Western blot for NSP4 expression in mock infected or RV-infected MA104-GCaMP6s/shRNA cell lines. Cells expressing either scrambled, NSP4 shRNA1, or NSP4 shRNA2 are as indicated. Arrow denotes full-length, glycosylated NSP4. (B) Densitometry analysis of western blots for NSP4 levels normalized to that of GAPDH levels, expressed as relative to NSP4 expressed in MA104-GCaMP6s/scrambled shRNA cells. Data shown are mean ± SD of 3 infections/condition and representative of 3 independent experiments. (C) Plaque assay of MA104-GCaMP6s/shRNA cell lines inoculated with SA114F (10<sup>-6</sup> dilution). (D) Representative single-cell traces of relative GCaMP6s fluorescence (F/F<sub>0</sub>) from SA114F infection of cells expressing scrambled shRNA (red) or NSP4 shRNA2 (blue). (E) Number of Ca<sup>2+</sup> spikes (F/F<sub>0</sub> > 5%) from mock or RV-infected cells inoculated with MOI0.1 SA114F. Data shown as mean ± SD of 60 cells/condition. \*\*p<0.01.

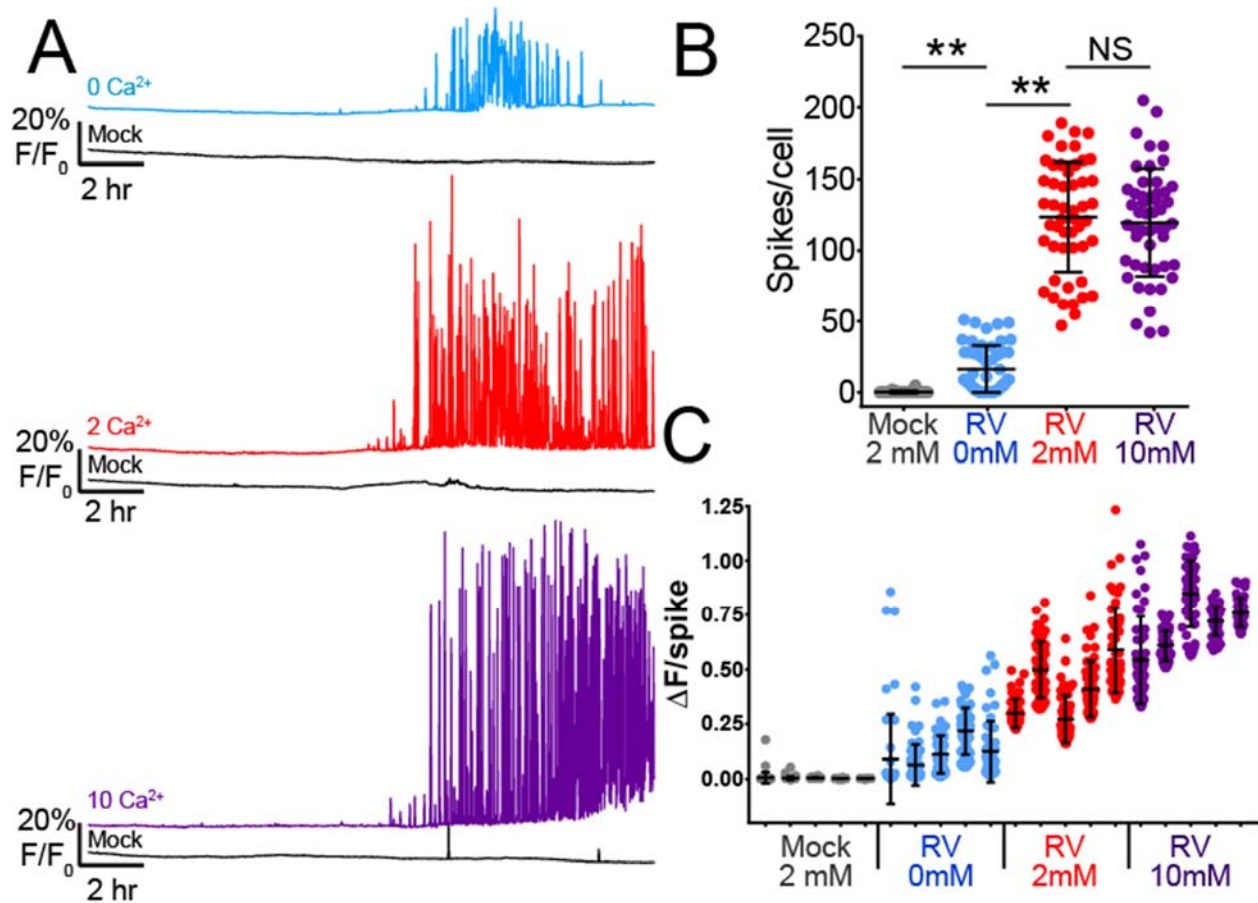

904  
905  
906  
907  
908  
909  
910  
911

**Figure 6. Ca<sup>2+</sup> signaling requires extracellular Ca<sup>2+</sup>.** (A) Representative single-cell traces of relative GCaMP5G fluorescence (F/F<sub>0</sub>) from mock (black lines) or SA114F infected cells in Ca<sup>2+</sup>-free media (0Ca<sup>2+</sup>, light blue), normal media (2Ca<sup>2+</sup>, red), and high Ca<sup>2+</sup> media (10Ca<sup>2+</sup>, purple). (B) Number of Ca<sup>2+</sup> spikes (F/F<sub>0</sub> > 5%) from mock or RV-infected cells inoculated with MOI 1 SA114F and maintained in the indicated media. Data shown as mean ± SD of 50 cells/condition. \*\*p<0.01. (C) Ca<sup>2+</sup> spike amplitude of the top 50 Ca<sup>2+</sup> spikes from five representative mock and RV-infected cells in each media condition.

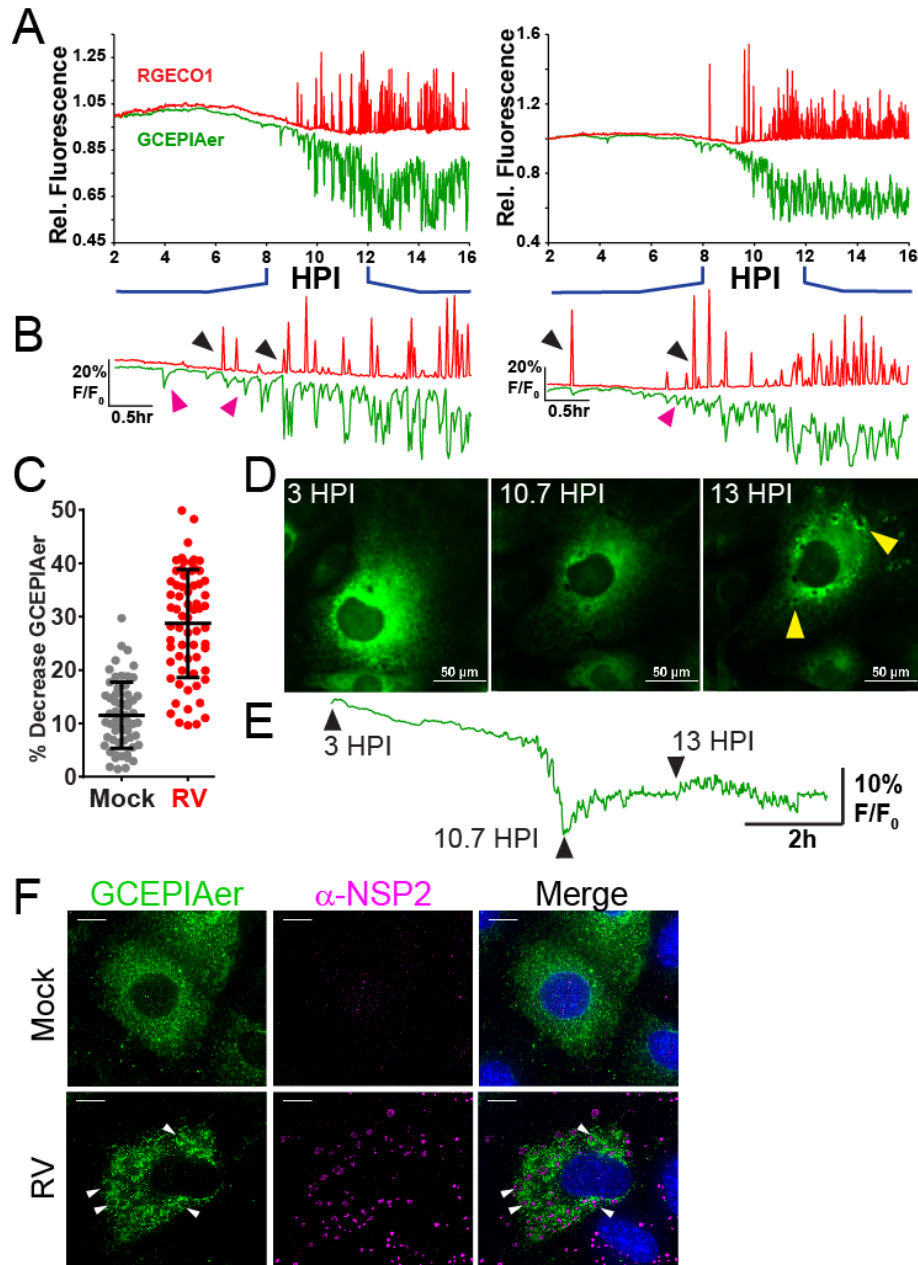

912  
 913 **Figure 7. RV induces dynamic decreases in ER  $\text{Ca}^{2+}$  that coincide with cytoplasmic  $\text{Ca}^{2+}$**   
 914 **signals. (A)** Two representative single-cell traces of relative RGECO1.2 (red) and GCEPIAer  
 915 (green) fluorescence ( $F/F_0$ , both RGECO1.2 and GCEPIAer are shown on the same scale) from  
 916 MA104-RGECO/GCEPIAer cells infected with SA114F at MOI 1. **(B)** Traces from (A) expanded  
 917 to show details from 8-12 HPI. Black arrowheads indicate ER  $\text{Ca}^{2+}$  troughs that correspond to  
 918 cytoplasmic  $\text{Ca}^{2+}$  spikes. Magenta arrowheads indicate ER  $\text{Ca}^{2+}$  troughs that lack a  
 919 corresponding cytoplasmic  $\text{Ca}^{2+}$  spike. **(C)** Percent decrease in ER  $\text{Ca}^{2+}$  levels measured by  
 920 GCEPIAer fluorescence. **(D-E)** Images of a representative RV-infected MA104-GCEPIAer cell  
 921 (D) taken at 3, 7.75, and 10 HPI and the corresponding trace from that cell with arrowheads  
 922 corresponding to the images above. Formation of viroplasm structures (yellow arrowheads) are  
 923 observed subsequent to the decrease in ER  $\text{Ca}^{2+}$  levels. **(F)** Deconvolution microscopy of mock  
 924 or RV-infected MA104-GCEPIAer cells (MOI 0.25, fixed 24 hpi) stained with  $\alpha$ -NSP2 [Dylight  
 925 549 (pink)] to detect viroplasms (white arrowheads). (scale bar = 10  $\mu\text{m}$ )

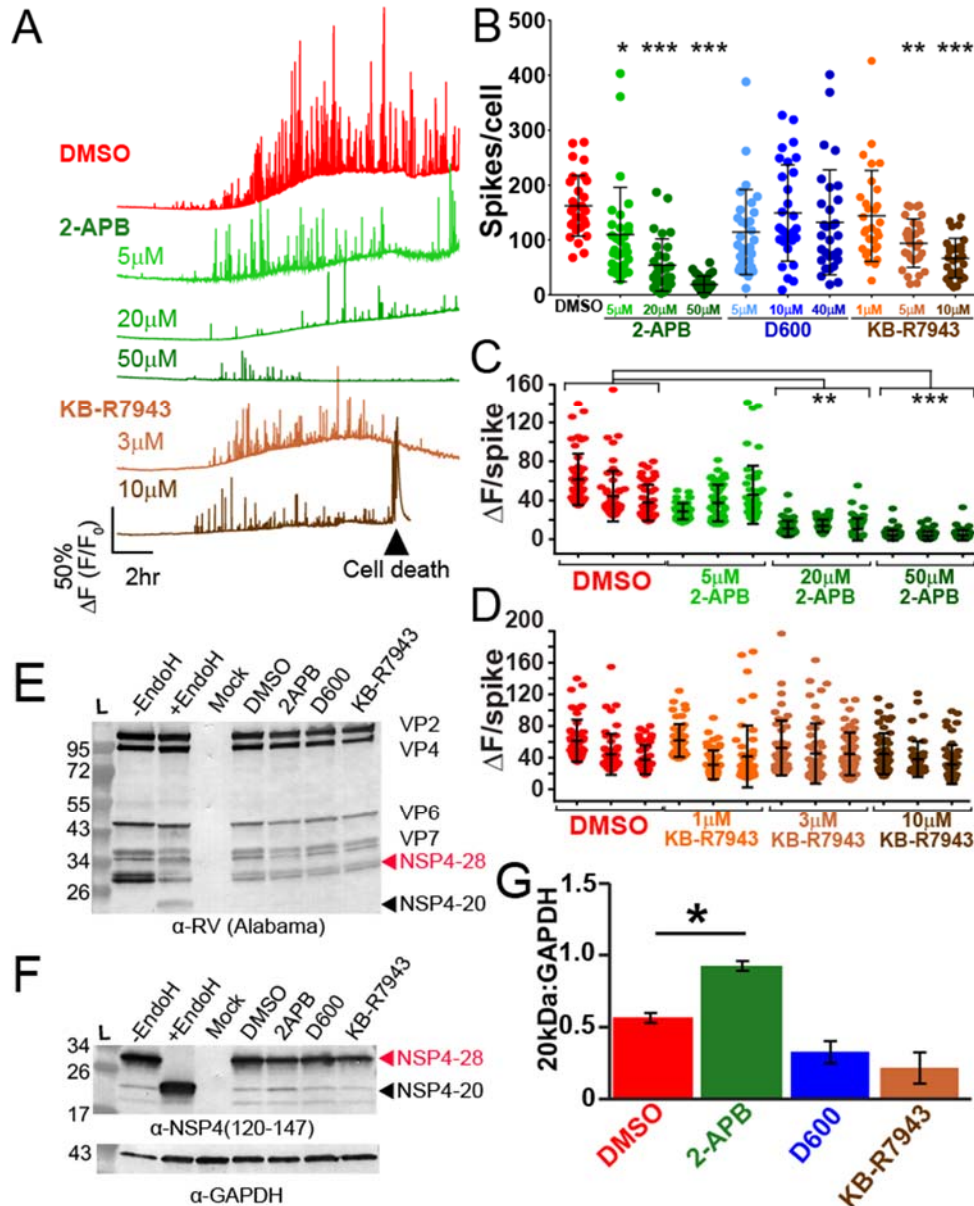

926  
 927 **Figure 8. RV-induced Ca<sup>2+</sup> signaling is blocked by the SOCE blocker 2APB. (A)**  
 928 Representative single-cell traces from MA104-GCaMP5G cells infected with SA114F MOI 1 and  
 929 treated with DMSO vehicle alone or the indicated doses of 2APB or KB-R7943. Cell death of  
 930 RV-infected cells treatment with 10 μM KB-R7943 was frequently observed (black arrowhead).  
 931 **(B)** Number of Ca<sup>2+</sup> spikes (F/F<sub>0</sub> > 5%) from RV-infected cells inoculated with MOI 1 and treated  
 932 with the indicated concentration of 2APB, D600 or KB-R7943. **(C-D)** Ca<sup>2+</sup> spike amplitude of the  
 933 top 50 Ca<sup>2+</sup> spikes from three representative RV-infected cells treated DMSO (vehicle) or the  
 934 indicated concentration of 2APB (C) or KB-R7943 (D). **(E-F)** Western blot analysis of MA104-  
 935 GCaMP5G cells mock or RV-infected MOI 1 and treated with DMSO (vehicle), 50 μM 2APB, 10  
 936 μM D600, or 10 μM KB-R7943. Control RV-infected lysates treated with Endoglycosidase H  
 937 (+EndoH) or untreated (-EndoH) are also shown. Blots were detected with α-RV (E) or α-  
 938 NSP4(120-147) (F) and α-GAPDH (F, bottom) was the loading control for both. **(G)** ImageJ  
 939 analysis of unglycosylated NSP4 (20kDa) normalized to GAPDH from RV-infected cells treated  
 940 with the different blockers. Data are the mean ± SD of three independent infections per  
 941 condition. \*p<0.05

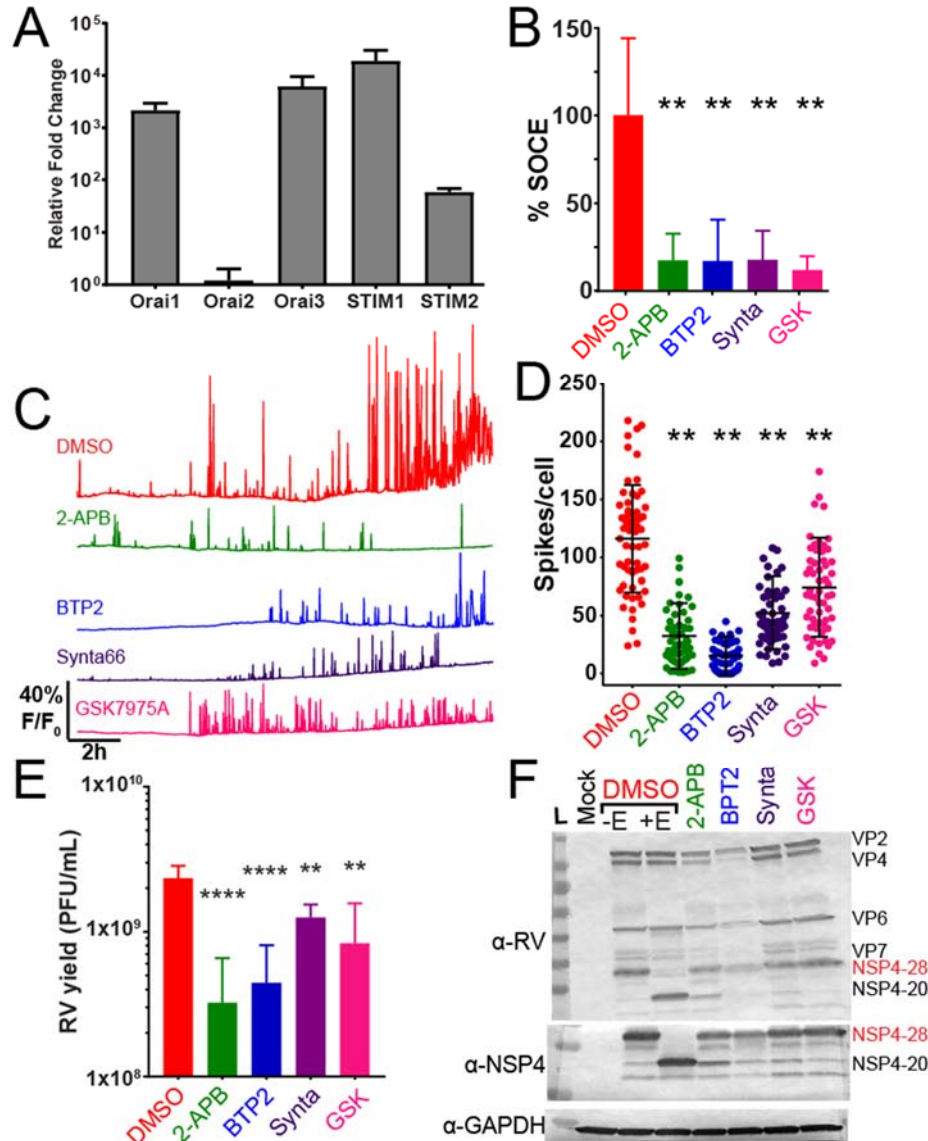

942  
 943 **Figure 9. SOCE blockers reduce RV-induced Ca<sup>2+</sup> signaling.** (A) Relative mRNA expression of Orai1-3 and STIM1-2 genes in MA104 cells. Expression is normalized to 16S rRNA and graphed relative to Orai2. (B) SOCE was activated by treatment with 0.5 μM thapsigargin in Ca<sup>2+</sup>-free buffer and the amount of SOCE relative to DMSO-alone (vehicle) for different SOCE blockers determined. Data are the mean ± SD of three independent runs. \*\*p<0.01. (C) Representative single-cell traces from MA104-GCaMP5G cells infected with SA114F MOI 1 and treated with DMSO vehicle alone or the indicated doses of 50 μM 2APB, 10 μM BTP2, 10 μM Synta66, or 10 μM GSK7975A. (D) Number of Ca<sup>2+</sup> spikes (F/F<sub>0</sub> > 5%) from RV-infected cells inoculated with MOI 1 and treated with DMSO alone or the SOCE blockers. Data are the mean ± SD 60 cells/condition. \*\*p<0.01 by one-way ANOVA. (E) SA114F yield from MA104-GCaMP5G cells treated with DMSO or the SOCE blockers. Data are the mean ± SD of three independent infections. \*\*\*\*p<0.0001; \*\*p<0.01 by one-way ANOVA. (F) Western blot analysis of MA104-GCaMP5G cells mock or RV-infected MOI 1 and treated with DMSO or the SOCE blockers. Control RV-infected lysates treated with Endoglycosidase H (+EndoH) or untreated (-EndoH) are also shown. Blots were detected with α-RV, α-NSP4(120-147), and α-GAPDH for the loading control.

944  
 945  
 946  
 947  
 948  
 949  
 950  
 951  
 952  
 953  
 954  
 955  
 956  
 957  
 958

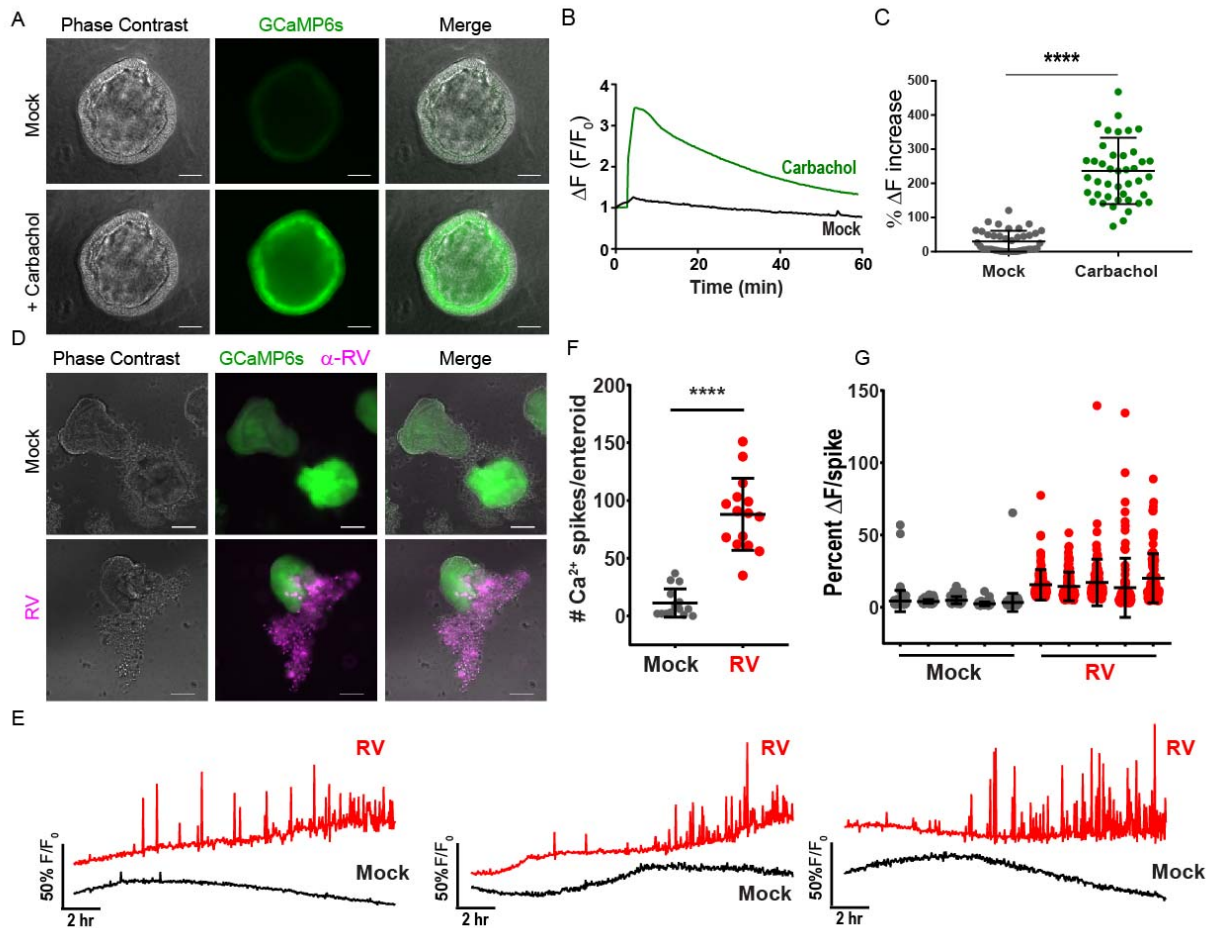

959  
 960 **Figure 10. jHIE-GCaMP6s enteroids exhibit dynamic Ca<sup>2+</sup> signaling during RV infection.**  
 961 **(A)** Representative images of jejunum human intestinal enteroids stably expressing GCaMP6s  
 962 (jHIE-GCaMP6s) one minute after addition of 200 μM carbachol or media alone (mock). **(B)**  
 963 Representative trace of jHIE-GCaMP6s treated with 200 μM carbachol or media alone.  
 964 GCaMP6s fluorescence (F) was normalized to the baseline fluorescence (F<sub>0</sub>). **(C)** The maximum  
 965 % increase in normalized fluorescence after addition of media (mock, N=41) or 200 μM  
 966 carbachol (N=43), data combined from 3 independent experiments. **(D)** Representative  
 967 immunofluorescence images of mock and Ito RV-infected jHIE-GCaMP6s (green) fixed at ~24  
 968 hpi and stained for RV [Alexa Fluor 568 (pink)]. **(E)** Representative Ca<sup>2+</sup> traces of whole jHIE-  
 969 GCaMP6s enteroids either mock or Ito RV-infected between 6-23 hpi. GCaMP6s fluorescence  
 970 (F) was normalized to the baseline fluorescence (F<sub>0</sub>). **(F)** Number of Ca<sup>2+</sup> spikes in mock (N=15)  
 971 or Ito RV-infected (N=15) HIEs and **(G)** the fold change in fluorescence for randomly selected 5  
 972 HIEs mock- and RV-infected. Data are representative of one experiment that was performed in  
 973 triplicate. \*\*\*\*p<0.0001, scale bars = 100 μm.



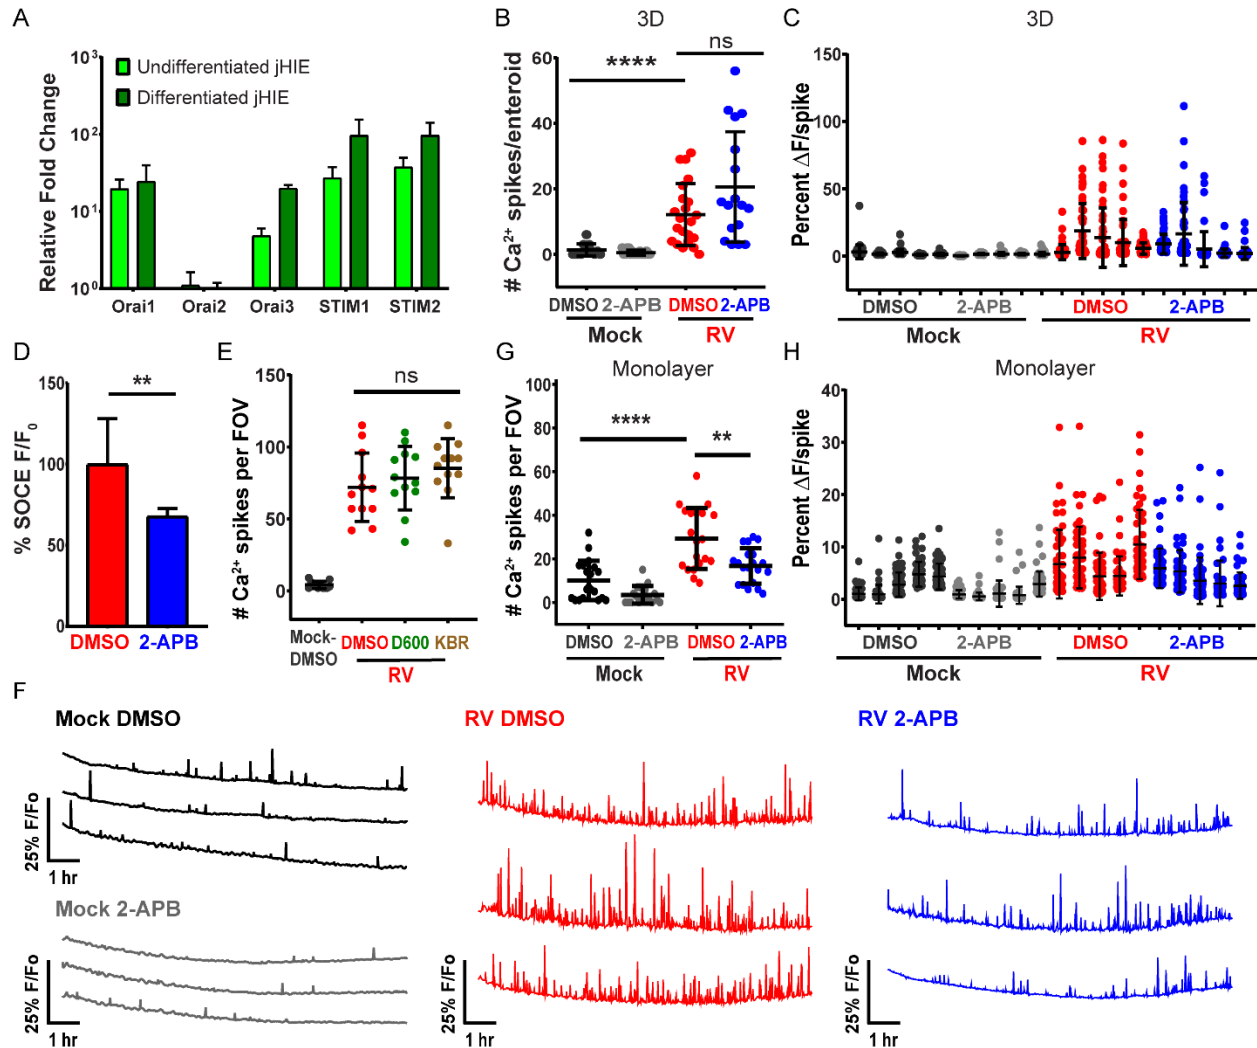

974  
975  
976  
977  
978  
979  
980  
981  
982  
983  
984  
985  
986  
987  
988  
989  
990  
991  
992

**Figure 11. Blocking SOCE reduces  $\text{Ca}^{2+}$  signaling during RV infection in jHIE-GCaMP6s monolayers.** (A) qPCR of Orai and stromal interaction molecule (STIM) mRNA transcripts normalized to 18S mRNA transcripts and fold change relative to Orai2 mRNA transcript levels in jejunum human intestinal enteroids (jHIEs), log scale ( $n = 3$  biological replicates). (B) Number of  $\text{Ca}^{2+}$  spikes in 3D jHIE-GCaMP6s mock- or RV-infected and treated with DMSO ( $N=12, 18$ ) or  $50 \mu\text{M}$  2APB ( $N=22, 17$ ) and (C) the percent change in fluorescence for the highest 50  $\text{Ca}^{2+}$  spikes for 5 HIEs of each condition for 6-18 hpi. GCaMP6s fluorescence (F) was normalized to the baseline fluorescence ( $F_0$ ). Data are representative of one experiment that was performed in triplicate. (D) Number of  $\text{Ca}^{2+}$  spikes per field-of-view (FOV) in mock- or RV-infected jHIE-GCaMP6s monolayers treated with DMSO,  $10 \mu\text{M}$  D600, or  $10 \mu\text{M}$  KB-R7943 between 8-22 hpi, data combined from 3 experiments. (E) Relative fluorescence increase ( $F/F_0$ ) due to store-operated calcium entry in jHIE-GCaMP6s monolayers after store depletion with  $500 \text{ nM}$  thapsigargin. Data combined from  $\geq 6$  experiments. (F) Representative  $\text{Ca}^{2+}$  traces per FOV of monolayers either mock- or RV-infected and treated with DMSO or  $50 \mu\text{M}$  2APB between 8-19 hpi. (G) Number of  $\text{Ca}^{2+}$  spikes per FOV and (H) the percent change in fluorescence for the highest 50  $\text{Ca}^{2+}$  spikes for 5 FOVs of each condition for 8-19 hpi. Data combined from 5 experiments. (\*\* $p < 0.01$ , \*\*\*\* $p < 0.0001$ )

## References

- 1001  
1002  
1003 1 Hyser, J. M. & Estes, M. K. Pathophysiological Consequences of Calcium-Conducting  
1004 Viroporins. *Annu. Rev. Virol* **2**, 473-496, doi:10.1146/annurev-virology-100114-054846  
1005 [doi] (2015).  
1006 2 Troeger, C. *et al.* Rotavirus Vaccination and the Global Burden of Rotavirus Diarrhea  
1007 Among Children Younger Than 5 Years. *JAMA Pediatr* **172**, 958-965,  
1008 doi:10.1001/jamapediatrics.2018.1960 (2018).  
1009 3 Thiagarajah, J. R., Donowitz, M. & Verkman, A. S. Secretory diarrhoea: mechanisms  
1010 and emerging therapies. *Nat. Rev. Gastroenterol. Hepatol* **12**, 446-457,  
1011 doi:nrgastro.2015.111 [pii];10.1038/nrgastro.2015.111 [doi] (2015).  
1012 4 Michelangeli, F., Ruiz, M. C., del Castillo, J. R., Ludert, J. E. & Liprandi, F. Effect of  
1013 rotavirus infection on intracellular calcium homeostasis in cultured cells. *Virology* **181**,  
1014 520-527 (1991).  
1015 5 Sastri, N. P., Crawford, S. E. & Estes, M. K. in *Viral Gastroenteritis: Molecular*  
1016 *Epidemiology and Pathogenesis* (eds L. Svensson, U. Desselberger, H.B. Greenberg, &  
1017 M.K. Estes) Ch. 2.4, 145-174 (Elsevier Academic Press, 2016).  
1018 6 Tian, P. *et al.* The rotavirus nonstructural glycoprotein NSP4 mobilizes Ca<sup>2+</sup> from the  
1019 endoplasmic reticulum. *J Virol* **69**, 5763-5772 (1995).  
1020 7 Diaz, Y. *et al.* Expression of nonstructural rotavirus protein NSP4 mimics Ca<sup>2+</sup>  
1021 homeostasis changes induced by rotavirus infection in cultured cells. *J Virol* **82**, 11331-  
1022 11343 (2008).  
1023 8 Hyser, J. M., Collinson-Pautz, M. R., Utama, B. & Estes, M. K. Rotavirus disrupts  
1024 calcium homeostasis by NSP4 viroporin activity. *mBio* **1**, e00265-00210 (2010).  
1025 9 Pham, T., Perry, J. L., Dosey, T. L., Delcour, A. H. & Hyser, J. M. The Rotavirus NSP4  
1026 Viroporin Domain is a Calcium-conducting Ion Channel. *Sci Rep* **7**, 43487,  
1027 doi:10.1038/srep43487 (2017).  
1028 10 Hyser, J. M., Utama, B., Crawford, S. E., Broughman, J. R. & Estes, M. K. Activation of  
1029 the endoplasmic reticulum calcium sensor STIM1 and store-operated calcium entry by  
1030 rotavirus requires NSP4 viroporin activity. *J Virol* **87**, 13579-13588 (2013).  
1031 11 Diaz, Y. *et al.* Dissecting the Ca<sup>2+</sup> entry pathways induced by rotavirus infection and  
1032 NSP4-EGFP expression in Cos-7 cells. *Virus. Res* **167**, 285-296 (2012).  
1033 12 Perez, J. F., Ruiz, M. C., Chemello, M. E. & Michelangeli, F. Characterization of a  
1034 membrane calcium pathway induced by rotavirus infection in cultured cells. *J Virol* **73**,  
1035 2481-2490 (1999).  
1036 13 Zhang, M., Zeng, C. Q., Morris, A. P. & Estes, M. K. A functional NSP4 enterotoxin  
1037 peptide secreted from rotavirus-infected cells. *J Virol* **74**, 11663-11670 (2000).  
1038 14 Dong, Y., Zeng, C. Q., Ball, J. M., Estes, M. K. & Morris, A. P. The rotavirus enterotoxin  
1039 NSP4 mobilizes intracellular calcium in human intestinal cells by stimulating  
1040 phospholipase C-mediated inositol 1,4,5-trisphosphate production. *Proc. Natl. Acad. Sci.*  
1041 *U. S. A* **94**, 3960-3965 (1997).  
1042 15 Ball, J. M., Tian, P., Zeng, C. Q., Morris, A. P. & Estes, M. K. Age-dependent diarrhea  
1043 induced by a rotaviral nonstructural glycoprotein. *Science* **272**, 101-104 (1996).  
1044 16 Morris, A. P. *et al.* NSP4 elicits age-dependent diarrhea and Ca<sup>2+</sup>-mediated I<sup>-</sup> influx  
1045 into intestinal crypts of CF mice. *Am. J Physiol* **277**, G431-G444 (1999).  
1046 17 Ousingsawat, J. *et al.* Rotavirus toxin NSP4 induces diarrhea by activation of TMEM16A  
1047 and inhibition of Na<sup>+</sup> absorption. *Pflugers. Arch* **461**, 579-589 (2011).  
1048 18 Perez, J. F., Chemello, M. E., Liprandi, F., Ruiz, M. C. & Michelangeli, F. Oncosis in  
1049 MA104 cells is induced by rotavirus infection through an increase in intracellular Ca<sup>2+</sup>  
1050 concentration. *Virology* **252**, 17-27 (1998).

- 1051 19 Brunet, J. P. *et al.* Rotavirus infection induces an increase in intracellular calcium  
1052 concentration in human intestinal epithelial cells: role in microvillar actin alteration. *J*  
1053 *Viro* **74**, 2323-2332 (2000).
- 1054 20 Tanwar, J. & Motiani, R. K. Role of SOCE architects STIM and Orai proteins in Cell  
1055 Death. *Cell Calcium* **69**, 19-27, doi:S0143-4160(17)30059-3  
1056 [pii];10.1016/j.ceca.2017.06.002 [doi] (2018).
- 1057 21 Soboloff, J., Rothberg, B. S., Madesh, M. & Gill, D. L. STIM proteins: dynamic calcium  
1058 signal transducers. *Nat Rev Mol Cell Biol* **13**, 549-565 (2012).
- 1059 22 Zambrano, J. L. *et al.* Silencing of rotavirus NSP4 or VP7 expression reduces alterations  
1060 in Ca<sup>2+</sup> homeostasis induced by infection of cultured cells. *J Virol* **82**, 5815-5824 (2008).
- 1061 23 Perry, J. L., Ramachandran, N. K., Utama, B. & Hyser, J. M. Use of genetically-encoded  
1062 calcium indicators for live cell calcium imaging and localization in virus-infected cells.  
1063 *Methods* **90**, 28-38, doi:S1046-2023(15)30075-X [pii];10.1016/j.ymeth.2015.09.004 [doi]  
1064 (2015).
- 1065 24 Suzuki, J. *et al.* Imaging intraorganellar Ca<sup>2+</sup> at subcellular resolution using CEPIA. *Nat.*  
1066 *Commun* **5**, 4153, doi:ncomms5153 [pii];10.1038/ncomms5153 [doi] (2014).
- 1067 25 Bialowas, S. *et al.* Rotavirus and Serotonin Cross-Talk in Diarrhoea. *PLoS One* **11**,  
1068 e0159660, doi:10.1371/journal.pone.0159660 [doi];PONE-D-16-05251 [pii] (2016).
- 1069 26 Saxena, K. *et al.* Human Intestinal Enteroids: a New Model To Study Human Rotavirus  
1070 Infection, Host Restriction, and Pathophysiology. *J Virol* **90**, 43-56, doi:JVI.01930-15  
1071 [pii];10.1128/JVI.01930-15 [doi] (2015).
- 1072 27 Kanai, Y. *et al.* Entirely plasmid-based reverse genetics system for rotaviruses. *Proc Natl*  
1073 *Acad Sci U S A* **114**, 2349-2354, doi:10.1073/pnas.1618424114 (2017).
- 1074 28 Philip, A. A. H., B. E.; Garcia, M. L.; Abad, A. T.; Katen, S. P.; Patton, J. T. Collection of  
1075 recombinant rotaviruses expressing fluorescent reporter proteins. *Microbiol Resour*  
1076 *Announc* (2019).
- 1077 29 Crawford, S. E., Hyser, J. M., Utama, B. & Estes, M. K. Autophagy hijacked through  
1078 viroporin-activated calcium/calmodulin-dependent kinase kinase-beta signaling is  
1079 required for rotavirus replication. *Proc Natl Acad Sci U. S. A* **109**, E3405-E3413 (2012).
- 1080 30 Criglar, J. M. *et al.* A novel form of rotavirus NSP2 and phosphorylation-dependent  
1081 NSP2-NSP5 interactions are associated with viroplasm assembly. *J Virol* **88**, 786-798,  
1082 doi:10.1128/JVI.03022-13 (2014).
- 1083 31 Hyser, J. M., Zeng, C. Q., Beharry, Z., Palzkill, T. & Estes, M. K. Epitope mapping and  
1084 use of epitope-specific antisera to characterize the VP5\* binding site in rotavirus SA11  
1085 NSP4. *Virology* **373**, 211-228 (2008).
- 1086 32 Chang-Graham, A. L. *et al.* Human intestinal enteroids with inducible neurogenin-3  
1087 expression as a novel model of gut hormone secretion. *bioRxiv*, 579698,  
1088 doi:10.1101/579698 (2019).
- 1089 33 Sato, T. *et al.* Long-term expansion of epithelial organoids from human colon, adenoma,  
1090 adenocarcinoma, and Barrett's epithelium. *Gastroenterology* **141**, 1762-1772 (2011).
- 1091 34 Chang-Graham, A. L. *et al.* Human intestinal enteroids with inducible neurogenin-3  
1092 expression as a novel model of gut hormone secretion. *Cell Mol Gastroenterol Hepatol*,  
1093 doi:10.1016/j.jcmgh.2019.04.010 (2019).
- 1094 35 Ettayebi, K. *et al.* Replication of human noroviruses in stem cell-derived human  
1095 enteroids. *Science* **353**, 1387-1393, doi:science.aaf5211 [pii];10.1126/science.aaf5211  
1096 [doi] (2016).
- 1097 36 VanDussen, K. L. *et al.* Development of an enhanced human gastrointestinal epithelial  
1098 culture system to facilitate patient-based assays. *Gut* **64**, 911-920, doi:10.1136/gutjnl-  
1099 2013-306651 (2015).
- 1100 37 Estes, M. K., Graham, D. Y., Gerba, C. P. & Smith, E. M. Simian rotavirus SA11  
1101 replication in cell cultures. *J Virol* **31**, 810-815 (1979).

- 1102 38 Matrosovich, M., Matrosovich, T., Garten, W. & Klenk, H. D. New low-viscosity overlay  
1103 medium for viral plaque assays. *Virology* **333**, 63, doi:10.1016/S0022-5347(05)00633-3 (2006).
- 1104 39 del Castillo, J. R. *et al.* Rotavirus infection alters Na<sup>+</sup> and K<sup>+</sup> homeostasis in MA-104  
1105 cells. *J Gen. Virol* **72** ( Pt 3), 541-547 (1991).
- 1106 40 Zhang, M. *et al.* Mutations in rotavirus nonstructural glycoprotein NSP4 are associated  
1107 with altered virus virulence. *J Virol* **72**, 3666-3672 (1998).
- 1108 41 Zhao, Y. *et al.* An expanded palette of genetically encoded Ca<sup>2+</sup>(+) indicators. *Science*  
1109 **333**, 1888-1891, doi:science.1208592 [pii];10.1126/science.1208592 [doi] (2011).
- 1110 42 Shahrabadi, M. S., Babiuk, L. A. & Lee, P. W. Further analysis of the role of calcium in  
1111 rotavirus morphogenesis. *Virology* **158**, 103-111 (1987).
- 1112 43 Motiani, R. K., Stolwijk, J. A., Newton, R. L., Zhang, X. & Trebak, M. Emerging roles of  
1113 Orai3 in pathophysiology. *Channels. (Austin. )* **7**, 392-401, doi:24960  
1114 [pii];10.4161/chan.24960 [doi] (2013).
- 1115 44 Foulke-Abel, J. *et al.* Human enteroids as an ex-vivo model of host-pathogen  
1116 interactions in the gastrointestinal tract. *Exp. Biol Med (Maywood. )* **239**, 1124-1134,  
1117 doi:1535370214529398 [pii];10.1177/1535370214529398 [doi] (2014).
- 1118 45 Zachos, N. C. *et al.* Human Enteroids/Colonoids and Intestinal Organoids Functionally  
1119 Recapitulate Normal Intestinal Physiology and Pathophysiology. *J Biol Chem* **291**, 3759-  
1120 3766, doi:R114.635995 [pii];10.1074/jbc.R114.635995 [doi] (2016).
- 1121 46 Zhou, Y., Frey, T. K. & Yang, J. J. Viral calciomics: interplays between Ca<sup>2+</sup> and virus.  
1122 *Cell Calcium* **46**, 1-17 (2009).
- 1123 47 Bhowmick, R. *et al.* Rotaviral enterotoxin nonstructural protein 4 targets mitochondria for  
1124 activation of apoptosis during infection. *J Biol Chem* **287**, 35004-35020 (2012).
- 1125 48 Dickman, K. G. *et al.* Rotavirus alters paracellular permeability and energy metabolism in  
1126 Caco-2 cells. *Am J Physiol Gastrointest Liver Physiol* **279**, G757-766,  
1127 doi:10.1152/ajpgi.2000.279.4.G757 (2000).
- 1128 49 Zhu, S. *et al.* Nlrp9b inflammasome restricts rotavirus infection in intestinal epithelial  
1129 cells. *Nature* **546**, 667-670, doi:10.1038/nature22967 (2017).
- 1130 50 Zambrano, J. L. *et al.* Rotavirus infection of cells in culture induces activation of RhoA  
1131 and changes in the actin and tubulin cytoskeleton. *PLoS One* **7**, e47612,  
1132 doi:10.1371/journal.pone.0047612 [doi];PONE-D-12-19556 [pii] (2012).
- 1133 51 Hagbom, M. *et al.* Rotavirus stimulates release of serotonin (5-HT) from human  
1134 enterochromaffin cells and activates brain structures involved in nausea and vomiting.  
1135 *PLoS Pathog* **7**, e1002115 (2011).
- 1136 52 Ruiz, M. C. *et al.* Ca<sup>2+</sup> permeability of the plasma membrane induced by rotavirus  
1137 infection in cultured cells is inhibited by tunicamycin and brefeldin A. *Virology* **333**, 54-65  
1138 (2005).
- 1139 53 Crawford, S. E. & Desselberger, U. Lipid droplets form complexes with viroplasm and  
1140 are crucial for rotavirus replication. *Curr. Opin Virol* **19**, 11-15, doi:S1879-  
1141 6257(16)30059-1 [pii];10.1016/j.coviro.2016.05.008 [doi] (2016).
- 1142
